# Supplementary material for: Serum metabolomic alterations in Beagle dogs experimentally infected with Toxocara canis
Source: Parasit Vectors. 2019 Sep 11;12:447. doi: 10.1186/s13071-019-3703-5 (PMC6737696; doi:10.1186/s13071-019-3703-5)
Supplement: Supplementary file 5 — Additional file 5: Table S2. Differential pathways of differential metabolites in ESI+ and ESI− mode at different infection stages by KEGG enrichment analysis. [file 13071_2019_3703_MOESM5_ESM.xlsx]

## Sheet: Sheet1
Table S2. Differential pathways of differential metabolites in ESI+ and ESI− mode at different infection stages by KEGG enrichment analysis
		Pathway ID	Pathway	Count	KEGG Names	KEGG IDs
ESI+	12 hpi	map01100	Metabolic pathways	22	(-)-alpha-Pinene; (1S,5S)-2,6,6-Trimethylbicyclo[3.1.1]hept-2-ene;; (-)-Camphene; (-)-Comphene;; d-Limonene; (+)-Limonene; (+)-(R)-Limonene; (+)-(4R)-Limonene;; (+)-Camphene; (+)-Comphene;;beta-Geraniol; Sabinene hydrate;; Geraniol;;(+)-Limonene;D-Limonene; (-)-alpha-Terpineol; (L)-alpha-Terpineol;; (-)-Limonene; (-)-(S)-Limonene; (-)-(4S)-Limonene;; Teasterone;; Typhasterol;; 6alpha-Hydroxy-cast…	C06308+C06305+C06099+C06304+C01500+C02462+C00521+C11393+C15791+C15793+C15803+C01455+C00633+C06202+C00180+C08814+C00811+C00082+C00166+C01673+C07712+C17339
		map00360	Phenylalanine metabolism	7	Benzoate; Benzoic acid; Benzenecarboxylic acid; Phenylformic acid; Dracylic acid;;m-Coumaric acid;4-Hydroxycinnamic acid; trans-2-Hydroxycinnamate; trans-2-Hydroxycinnamic acid; 2-Hydroxycinnamate; 2-Coumaric acid; o-Coumaric acid; 2-Coumarate;; 4-Coumarate; p-Coumaric acid; trans-4-Hydroxycinnamate; trans-p-Hydroxycinnamate; 4-Hydroxycinnamic acid; 4-Hydroxycinnamate;;2-Hydroxycinnamic acid;L-Ty…	C00180+C12621+C00811+C01772+C00082+C00166+C02763
		map00120	Primary bile acid biosynthesis	5	7alpha,25-Dihydroxy-4-cholesten-3-one;7alpha,24-dihydroxycholest-4-en-3-one; 7alpha,24-Dihydroxy-4-cholesten-3-one;; 7alpha,25-Dihydroxy-4-cholesten-3-one;; 3beta-Hydroxy-5-cholestenoate; 3beta-Hydroxycholest-5-en-27-oic acid;; 7alpha,26-Dihydroxy-4-cholesten-3-one;; 4-Cholesten-7alpha,12alpha-diol-3-one; 7alpha,12alpha-Dihydroxy-4-cholesten-3-one;	C17332+C17331+C17333+C17336+C17339
		map00350	Tyrosine metabolism	3	Beta-Tyrosine;4-Hydroxycinnamic acid; 4-Coumarate; p-Coumaric acid; trans-4-Hydroxycinnamate; trans-p-Hydroxycinnamate; 4-Hydroxycinnamic acid; 4-Hydroxycinnamate;;L-Tyrosine; L-Tyrosine; (S)-3-(p-Hydroxyphenyl)alanine; (S)-2-Amino-3-(p-hydroxyphenyl)propionic acid; Tyrosine;; 3-Amino-3-(4-hydroxyphenyl)propanoate; beta-Tyrosine;	C04368+C00811+C00082
		map01040	Biosynthesis of unsaturated fatty acids	3	Docosahexaenoic acid; (4Z,7Z,10Z,13Z,16Z,19Z)-Docosahexaenoic acid; 4,7,10,13,16,19-Docosahexaenoic acid; Docosahexaenoic acid; Docosahexaenoate;; (7Z,10Z,13Z,16Z,19Z)-Docosa-7,10,13,16,19-pentaenoic acid; Docosapentaenoic acid;; Icosadienoic acid; Eicosadienoic acid; 11,14-Icosadienoic acid; (11Z,14Z)-Icosa-11,14-dienoic acid; 11,14-Eicosadienoic acid; (11Z,14Z)-Eicosa-11,14-dienoic acid;;Eicosa…	C06429+C16513+C16525
		map00100	Steroid biosynthesis	2	Calcitriol; Calcitriol; 1alpha,25-Dihydroxyvitamin D3; (1S,3R,5Z,7E)-9,10-Seco-5,7,10(19)-cholestatriene-1,3,25-triol;; Secalciferol; 24(R),25-Dihydroxyvitamin D3; (24R),25-Dihydroxyvitamin D3; (3S,5Z,7E,24R)-9,10-Secocholesta-5,7,10-triene-3,24,25-triol;	C01673+C07712
		map00592	alpha-Linolenic acid metabolism	2	Traumatic acid; Traumatic acid; (2E)-Dodecenedioic acid; Dodec-2-enedioic acid;; Heptadecatrienal; (8Z,11Z,14Z)-8,11,14-Heptadecatrienal;	C16308+C16343
		map01230	Biosynthesis of amino acids	2	L-Tyrosine; L-Tyrosine; (S)-3-(p-Hydroxyphenyl)alanine; (S)-2-Amino-3-(p-hydroxyphenyl)propionic acid; Tyrosine;; Phenylpyruvate; Phenylpyruvic acid; alpha-Ketohydrocinnamic acid; keto-Phenylpyruvate; 3-Phenyl-2-oxopropanoate; 2-Oxo-3-phenylpropanoate;;Phenylpyruvic acid	C00082+C00166
		map01210	2-Oxocarboxylic acid metabolism	2	L-Tyrosine; L-Tyrosine; (S)-3-(p-Hydroxyphenyl)alanine; (S)-2-Amino-3-(p-hydroxyphenyl)propionic acid; Tyrosine;; Phenylpyruvate; Phenylpyruvic acid; alpha-Ketohydrocinnamic acid; keto-Phenylpyruvate; 3-Phenyl-2-oxopropanoate; 2-Oxo-3-phenylpropanoate;;Phenylpyruvic acid	C00082+C00166
		map00130	Ubiquinone and other terpenoid-quinone biosynthesis	2	4-Hydroxycinnamic acid; 4-Coumarate; p-Coumaric acid; trans-4-Hydroxycinnamate; trans-p-Hydroxycinnamate; 4-Hydroxycinnamic acid; 4-Hydroxycinnamate;;L-Tyrosine; L-Tyrosine; (S)-3-(p-Hydroxyphenyl)alanine; (S)-2-Amino-3-(p-hydroxyphenyl)propionic acid; Tyrosine;	C00811+C00082
		map00400	Phenylalanine, tyrosine and tryptophan biosynthesis	2	L-Tyrosine; L-Tyrosine; (S)-3-(p-Hydroxyphenyl)alanine; (S)-2-Amino-3-(p-hydroxyphenyl)propionic acid; Tyrosine;; Phenylpyruvate; Phenylpyruvic acid; alpha-Ketohydrocinnamic acid; keto-Phenylpyruvate; 3-Phenyl-2-oxopropanoate; 2-Oxo-3-phenylpropanoate;;Phenylpyruvic acid	C00082+C00166
		map00310	Lysine degradation	1	5-Acetamidovalerate; 5-Acetamidopentanoate;	C03087
		map05034	Alcoholism	1	L-Tyrosine; L-Tyrosine; (S)-3-(p-Hydroxyphenyl)alanine; (S)-2-Amino-3-(p-hydroxyphenyl)propionic acid; Tyrosine;	C00082
		map00730	Thiamine metabolism	1	L-Tyrosine; L-Tyrosine; (S)-3-(p-Hydroxyphenyl)alanine; (S)-2-Amino-3-(p-hydroxyphenyl)propionic acid; Tyrosine;	C00082
		map04961	Endocrine and other factor-regulated calcium reabsorption	1	Calcitriol; Calcitriol; 1alpha,25-Dihydroxyvitamin D3; (1S,3R,5Z,7E)-9,10-Seco-5,7,10(19)-cholestatriene-1,3,25-triol;	C01673
		map00970	Aminoacyl-tRNA biosynthesis	1	L-Tyrosine; L-Tyrosine; (S)-3-(p-Hydroxyphenyl)alanine; (S)-2-Amino-3-(p-hydroxyphenyl)propionic acid; Tyrosine;	C00082
		map05030	Cocaine addiction	1	L-Tyrosine; L-Tyrosine; (S)-3-(p-Hydroxyphenyl)alanine; (S)-2-Amino-3-(p-hydroxyphenyl)propionic acid; Tyrosine;	C00082
		map04917	Prolactin signaling pathway	1	L-Tyrosine; L-Tyrosine; (S)-3-(p-Hydroxyphenyl)alanine; (S)-2-Amino-3-(p-hydroxyphenyl)propionic acid; Tyrosine;	C00082
		map04916	Melanogenesis	1	L-Tyrosine; L-Tyrosine; (S)-3-(p-Hydroxyphenyl)alanine; (S)-2-Amino-3-(p-hydroxyphenyl)propionic acid; Tyrosine;	C00082
		map04974	Protein digestion and absorption	1	L-Tyrosine; L-Tyrosine; (S)-3-(p-Hydroxyphenyl)alanine; (S)-2-Amino-3-(p-hydroxyphenyl)propionic acid; Tyrosine;	C00082
		map04742	Taste transduction	1	Aspartame; Aspartame;	C11045
		map05230	Central carbon metabolism in cancer	1	L-Tyrosine; L-Tyrosine; (S)-3-(p-Hydroxyphenyl)alanine; (S)-2-Amino-3-(p-hydroxyphenyl)propionic acid; Tyrosine;	C00082
		map00524	Neomycin, kanamycin and gentamicin biosynthesis	1	Nebramine; 3'-Deoxyneamine;	C21259
		map00440	Phosphonate and phosphinate metabolism	1	N-Acetylbialaphos; N-Acetylphosphinothricin tripeptide;	C17951
		map05152	Tuberculosis	1	Calcitriol; Calcitriol; 1alpha,25-Dihydroxyvitamin D3; (1S,3R,5Z,7E)-9,10-Seco-5,7,10(19)-cholestatriene-1,3,25-triol;	C01673
		map04978	Mineral absorption	1	Calcitriol; Calcitriol; 1alpha,25-Dihydroxyvitamin D3; (1S,3R,5Z,7E)-9,10-Seco-5,7,10(19)-cholestatriene-1,3,25-triol;	C01673
		map05012	Parkinson's disease	1	L-Tyrosine; L-Tyrosine; (S)-3-(p-Hydroxyphenyl)alanine; (S)-2-Amino-3-(p-hydroxyphenyl)propionic acid; Tyrosine;	C00082
		map05204	Chemical carcinogenesis	1	4-Hydroxy-4-(3-pyridyl)-butanoic acid; gamma-Hydroxy-3-pyridinebutanoate;	C19579
		map04750	Inflammatory mediator regulation of TRP channels	1	1,8-Cineole; 1,8-Cineol; Eucalyptol;;Eucalyptol	C09844
		map00980	Metabolism of xenobiotics by cytochrome P450	1	4-Hydroxy-4-(3-pyridyl)-butanoic acid; gamma-Hydroxy-3-pyridinebutanoate;	C19579
		map04728	Dopaminergic synapse	1	L-Tyrosine; L-Tyrosine; (S)-3-(p-Hydroxyphenyl)alanine; (S)-2-Amino-3-(p-hydroxyphenyl)propionic acid; Tyrosine;	C00082
		map05031	Amphetamine addiction	1	L-Tyrosine; L-Tyrosine; (S)-3-(p-Hydroxyphenyl)alanine; (S)-2-Amino-3-(p-hydroxyphenyl)propionic acid; Tyrosine;	C00082
	24 hpi	map01100	Metabolic pathways	35	Iridotrial; (1S,2R,3S)-2-Formyl-alpha-(hydroxymethylene)-3-methylcyclopentaneacetaldehyde;; TDE; DDD; 1,1-Dichloro-2,2-bis(4'-chlorophenyl)ethane; Dichlorodiphenyldichloroethane;; Anhydrorhodovibrin;; Thiamin monophosphate; Thiamine monophosphate; Thiamin phosphate; Thiamine phosphate; TMP;;6-Ketoprostaglandin E1; 11-Dehydro-thromboxane B2;; 6-Keto-prostaglandin E1; 6-Keto-PGE1;;Prostaglandin G2;…	C06070+C06636+C15877+C01081+C05962+C05964+C05956+C00313+C00010+C00473+C11887+C00695+C03618+C00025+C00979+C00217+C04281+C00762+C01780+C00951+C00449+C01595+C05455+C05445+C05453+C01561+C05501+C03594+C05444+C05451+C05454+C05500+C05502+C14151+C15882
		map00120	Primary bile acid biosynthesis	14	Cholic acid; Cholic acid; Cholate; 3alpha,7alpha,12alpha-Trihydroxy-5beta-cholanate; 3alpha,7alpha,12alpha-Trihydroxy-5beta-cholanic acid;; 7alpha-Hydroxycholest-4-en-3-one;; 3alpha,7alpha-Dihydroxy-5beta-cholestan-26-al;; 7alpha,12alpha-Dihydroxy-5beta-cholestan-3-one; 5beta-Cholesten-7alpha,12alpha-diol-3-one;;7a-Hydroxy-cholestene-3-one; 7alpha,27-Dihydroxycholesterol; Cholest-5-ene-3beta,7alp…	C00695+C05455+C05445+C05453+C06341+C15518+C15520+C03594+C05444+C05451+C05454+C13550+C15519+C15610
		map00140	Steroid hormone biosynthesis	9	Cortisone; 17alpha,21-Dihydroxy-4-pregnene-3,11,20-trione; Kendall's compound E; Reichstein's substance Fa;; Aldosterone; 11beta,21-Dihydroxy-3,20-dioxo-4-pregnen-18-al;; Aldosterone hemiacetal; 11beta,18-Epoxy-18,21-dihydroxypregn-4-ene-3,20-dione;;Cortisone;17a-Estradiol; Estradiol-17beta; Estradiol; beta-Estradiol;;Estradiol; Estradiol-17alpha; 17alpha-Estradiol;; 17alpha,20alpha-Dihydroxychol…	C00762+C01780+C18039+C02537+C00951+C05499+C05501+C05500+C05502
		map04216	Ferroptosis	7	PE(18:0/20:4(5Z,8Z,11Z,14Z)); 1-Octadecanoyl-2-(5Z,8Z,11Z,14Z-eicosatetraenoyl)-sn-glycero-3-phosphoethanolamine;; 1-Octadecanoyl-2-(7Z,10Z,13Z,16Z-docosatetraenoyl)-sn-glycero-3-phosphoethanolamine;;PE(18:0/22:4(7Z,10Z,13Z,16Z)); 1-Octadecanoyl-2-(15S-hydroperoxy-5Z,8Z,11Z,13E-eicosatetraenoyl)-sn-glycero-3-phosphoethanolamine; 18:0/15-HpETE-PE;; CoA; Coenzyme A; CoA-SH;;Coenzyme A; Ubiquinone-1…	C21480+C21481+C21483+C00010+C11378+C00025+C21484
		map00330	Arginine and proline metabolism	6	4-Oxoproline; 4-Oxo-L-proline;; L-Glutamate; L-Glutamic acid; L-Glutaminic acid; Glutamate;;(3R,5S)-1-pyrroline-3-hydroxy-5-carboxylic Acid;L-4-Hydroxyglutamate semialdehyde; L-1-Pyrroline-3-hydroxy-5-carboxylate; 3-Hydroxy-L-1-pyrroline-5-carboxylate; (3R,5S)-1-Pyrroline-3-hydroxy-5-carboxylate; (3R,5S)-3-Hydroxy-1-pyrroline-5-carboxylate;;L-Glutamic acid; L-4-Hydroxyglutamate semialdehyde;;1-Py…	C01877+C00025+C04281+C05938+C04282+C05941
		map00130	Ubiquinone and other terpenoid-quinone biosynthesis	5	Ubiquinone-8; Coenzyme Q8;; all-trans-Decaprenyl diphosphate;; all-trans-Nonaprenyl diphosphate; Solanesyl pyrophosphate; Solanesyl diphosphate;; delta-Tocopherol;; 2-Methyl-6-phytylquinol; 2-Methyl-6-phytyl-1,4-hydroquinone; 2-Methyl-6-phytylbenzene-1,4-diol; 2-Methyl-6-phytyl-1,4-benzoquinol;;Delta-Tocopherol	C17569+C17432+C04145+C14151+C15882
		map00590	Arachidonic acid metabolism	5	2,3-Dinor-8-iso prostaglandin F2alpha; 2,3-Dinor-8-iso PGF2alpha;; 2,3-Dinor-8-iso prostaglandin F1alpha; 2,3-Dinor-8-iso PGF1alpha;;6-Ketoprostaglandin E1; 11-Dehydro-thromboxane B2;; 6-Keto-prostaglandin E1; 6-Keto-PGE1;;Prostaglandin G2; Prostaglandin G2; PGG2;	C14794+C14795+C05962+C05964+C05956
		map04977	Vitamin digestion and absorption	4	alpha-Tocopherol acetate; Tocopherol acetate;; CoA; Coenzyme A; CoA-SH;;Coenzyme A; Retinol; all-trans-Retinol; Vitamin A; Vitamin A1;; Bile salt; Bile acid;	C13202+C00010+C00473+C01558
		map00900	Terpenoid backbone biosynthesis	4	all-trans-Decaprenyl diphosphate;; (2Z,6Z,10Z,14Z,18Z,22Z,26Z,30Z,34E)-Decaprenyl diphosphate;; all-trans-Nonaprenyl diphosphate; Solanesyl pyrophosphate; Solanesyl diphosphate;; 2-trans,6-trans-Farnesal; trans,trans-Farnesal; Farnesal; (2E,6E)-3,7,11-Trimethyl-2,6,10-dodecatrienal; (2E,6E)-Farnesal;;2-trans,6-trans-Farnesal	C17432+C18321+C04145+C03461
		map00471	D-Glutamine and D-glutamate metabolism	3	5-Oxo-D-proline; D-Pyroglutamic acid; D-5-Pyrrolidone-2-carboxylic acid;; L-Glutamate; L-Glutamic acid; L-Glutaminic acid; Glutamate;; D-Glutamate; D-Glutamic acid; D-Glutaminic acid; D-2-Aminoglutaric acid;;L-Glutamic acid;D-Glutamic acid	C02237+C00025+C00217
		map00830	Retinol metabolism	3	Retinol; all-trans-Retinol; Vitamin A; Vitamin A1;; 11-cis-Retinol;;9-cis-Retinol; 9-cis-Retinol;;11-cis-Retinol	C00473+C00899+C16682
		map00630	Glyoxylate and dicarboxylate metabolism	3	Oxalyl-CoA;; L-threo-3-Methylaspartate; (2S,3S)-3-Methylaspartate;; L-Glutamate; L-Glutamic acid; L-Glutaminic acid; Glutamate;;L-Glutamic acid	C00313+C03618+C00025
		map01230	Biosynthesis of amino acids	3	L-Glutamate; L-Glutamic acid; L-Glutaminic acid; Glutamate;; O-Acetyl-L-serine; O3-Acetyl-L-serine;;O-Acetylserine;L-Glutamic acid;Saccharopine; N6-(L-1,3-Dicarboxypropyl)-L-lysine; Saccharopine; L-Saccharopine; N-[(S)-5-Amino-5-carboxypentyl]-L-glutamic acid;	C00025+C00979+C00449
		map01200	Carbon metabolism	3	L-threo-3-Methylaspartate; (2S,3S)-3-Methylaspartate;; L-Glutamate; L-Glutamic acid; L-Glutaminic acid; Glutamate;; O-Acetyl-L-serine; O3-Acetyl-L-serine;;O-Acetylserine;L-Glutamic acid	C03618+C00025+C00979
		map00524	Neomycin, kanamycin and gentamicin biosynthesis	2	6'-Oxo-G418;; L-Glutamate; L-Glutamic acid; L-Glutaminic acid; Glutamate;;L-Glutamic acid	C21268+C00025
		map04726	Serotonergic synapse	2	11-Dehydro-thromboxane B2;;Prostaglandin G2; Prostaglandin G2; PGG2;	C05964+C05956
		map05200	Pathways in cancer	2	Cortisone; 17alpha,21-Dihydroxy-4-pregnene-3,11,20-trione; Kendall's compound E; Reichstein's substance Fa;;Cortisone; Estradiol-17beta; Estradiol; beta-Estradiol;;Estradiol	C00762+C00951
		map00591	Linoleic acid metabolism	2	Linoleic acid; Linoleate; Linoleic acid; (9Z,12Z)-Octadecadienoic acid; 9-cis,12-cis-Octadecadienoate; 9-cis,12-cis-Octadecadienoic acid;;Bovinic acid; 9-cis,11-trans-Octadecadienoate; (9Z,11E)-Octadecadienoic acid;	C01595+C04056
		map04975	Fat digestion and absorption	2	CoA; Coenzyme A; CoA-SH;;Coenzyme A; Bile salt; Bile acid;	C00010+C01558
		map04960	Aldosterone-regulated sodium reabsorption	2	Cortisone; 17alpha,21-Dihydroxy-4-pregnene-3,11,20-trione; Kendall's compound E; Reichstein's substance Fa;; Aldosterone; 11beta,21-Dihydroxy-3,20-dioxo-4-pregnen-18-al;;Cortisone	C00762+C01780
		map05215	Prostate cancer	2	Cortisone; 17alpha,21-Dihydroxy-4-pregnene-3,11,20-trione; Kendall's compound E; Reichstein's substance Fa;;Cortisone; Estradiol-17beta; Estradiol; beta-Estradiol;;Estradiol	C00762+C00951
		map02010	ABC transporters	2	Norfloxacin; Norfloxacin;; L-Glutamate; L-Glutamic acid; L-Glutaminic acid; Glutamate;;L-Glutamic acid	C06687+C00025
		map04723	Retrograde endocannabinoid signaling	2	L-Glutamate; L-Glutamic acid; L-Glutaminic acid; Glutamate;;L-Glutamic acid;Anandamide; Anandamide; Arachidonylethanolamide; N-(5Z,8Z,11Z,14Z-icosatetraenoyl)-ethanolamide; AEA;	C00025+C11695
		map00860	Porphyrin and chlorophyll metabolism	2	Geranylgeranyl bacteriochlorophyllide a;; L-Glutamate; L-Glutamic acid; L-Glutaminic acid; Glutamate;;L-Glutamic acid	C21217+C00025
		map00480	Glutathione metabolism	2	5-Oxoproline; Pidolic acid; Pyroglutamic acid; 5-Pyrrolidone-2-carboxylic acid; Pyroglutamate; 5-Oxo-L-proline; L-Pyroglutamic acid; L-5-Pyrrolidone-2-carboxylic acid;; L-Glutamate; L-Glutamic acid; L-Glutaminic acid; Glutamate;;L-Glutamic acid;Pyroglutamic acid	C01879+C00025
		map04750	Inflammatory mediator regulation of TRP channels	2	Anandamide; Anandamide; Arachidonylethanolamide; N-(5Z,8Z,11Z,14Z-icosatetraenoyl)-ethanolamide; AEA;; Phorbol;	C11695+C09155
		map04080	Neuroactive ligand-receptor interaction	2	L-Glutamate; L-Glutamic acid; L-Glutaminic acid; Glutamate;;L-Glutamic acid;Anandamide; Anandamide; Arachidonylethanolamide; N-(5Z,8Z,11Z,14Z-icosatetraenoyl)-ethanolamide; AEA;	C00025+C11695
		map04979	Cholesterol metabolism	1	Cholest-5-ene-3beta,26-diol; Cholest-5-ene-3beta,27-diol; 26-Hydroxycholesterol; 27-Hydroxycholesterol;	C15610
		map00564	Glycerophospholipid metabolism	1	2,3-Bis-O-(geranylgeranyl)-sn-glycero-1-phospho-L-serine;	C20466
		map04725	Cholinergic synapse	1	CoA; Coenzyme A; CoA-SH;;Coenzyme A	C00010
		map04068	FoxO signaling pathway	1	L-Glutamate; L-Glutamic acid; L-Glutaminic acid; Glutamate;;L-Glutamic acid	C00025
		map00650	Butanoate metabolism	1	L-Glutamate; L-Glutamic acid; L-Glutaminic acid; Glutamate;;L-Glutamic acid	C00025
		map04730	Long-term depression	1	L-Glutamate; L-Glutamic acid; L-Glutaminic acid; Glutamate;;L-Glutamic acid	C00025
		map04721	Synaptic vesicle cycle	1	L-Glutamate; L-Glutamic acid; L-Glutaminic acid; Glutamate;;L-Glutamic acid	C00025
		map04974	Protein digestion and absorption	1	L-Glutamate; L-Glutamic acid; L-Glutaminic acid; Glutamate;;L-Glutamic acid	C00025
		map04724	Glutamatergic synapse	1	L-Glutamate; L-Glutamic acid; L-Glutaminic acid; Glutamate;;L-Glutamic acid	C00025
		map05033	Nicotine addiction	1	L-Glutamate; L-Glutamic acid; L-Glutaminic acid; Glutamate;;L-Glutamic acid	C00025
		map00920	Sulfur metabolism	1	O-Acetyl-L-serine; O3-Acetyl-L-serine;;O-Acetylserine	C00979
		map04915	Estrogen signaling pathway	1	Estradiol-17beta; Estradiol; beta-Estradiol;;Estradiol	C00951
		map05031	Amphetamine addiction	1	L-Glutamate; L-Glutamic acid; L-Glutaminic acid; Glutamate;;L-Glutamic acid	C00025
		map04917	Prolactin signaling pathway	1	Estradiol-17beta; Estradiol; beta-Estradiol;;Estradiol	C00951
		map04964	Proximal tubule bicarbonate reclamation	1	L-Glutamate; L-Glutamic acid; L-Glutaminic acid; Glutamate;;L-Glutamic acid	C00025
		map05030	Cocaine addiction	1	L-Glutamate; L-Glutamic acid; L-Glutaminic acid; Glutamate;;L-Glutamic acid	C00025
		map04742	Taste transduction	1	L-Glutamate; L-Glutamic acid; L-Glutaminic acid; Glutamate;;L-Glutamic acid	C00025
		map01210	2-Oxocarboxylic acid metabolism	1	L-Glutamate; L-Glutamic acid; L-Glutaminic acid; Glutamate;;L-Glutamic acid	C00025
		map05152	Tuberculosis	1	Calcidiol; 25-Hydroxyvitamin D3; Calcifediol; Calcifediol anhydrous; (3S,5Z,7E)-9,10-Seco-5,7,10(19)-cholestatriene-3,25-diol;;Calcidiol	C01561
		map04720	Long-term potentiation	1	L-Glutamate; L-Glutamic acid; L-Glutaminic acid; Glutamate;;L-Glutamic acid	C00025
		map00071	Fatty acid degradation	1	CoA; Coenzyme A; CoA-SH;;Coenzyme A	C00010
		map04713	Circadian entrainment	1	L-Glutamate; L-Glutamic acid; L-Glutaminic acid; Glutamate;;L-Glutamic acid	C00025
		map00910	Nitrogen metabolism	1	L-Glutamate; L-Glutamic acid; L-Glutaminic acid; Glutamate;;L-Glutamic acid	C00025
		map04961	Endocrine and other factor-regulated calcium reabsorption	1	Estradiol-17beta; Estradiol; beta-Estradiol;;Estradiol	C00951
		map00310	Lysine degradation	1	Saccharopine; N6-(L-1,3-Dicarboxypropyl)-L-lysine; Saccharopine; L-Saccharopine; N-[(S)-5-Amino-5-carboxypentyl]-L-glutamic acid;	C00449
		map05224	Breast cancer	1	Estradiol-17beta; Estradiol; beta-Estradiol;;Estradiol	C00951
		map04913	Ovarian steroidogenesis	1	Estradiol-17beta; Estradiol; beta-Estradiol;;Estradiol	C00951
		map00270	Cysteine and methionine metabolism	1	O-Acetyl-L-serine; O3-Acetyl-L-serine;;O-Acetylserine	C00979
		map04614	Renin-angiotensin system	1	Angiotensin (5-8); Angiotensin-(5-8);	C20972
		map00970	Aminoacyl-tRNA biosynthesis	1	L-Glutamate; L-Glutamic acid; L-Glutaminic acid; Glutamate;;L-Glutamic acid	C00025
		map00230	Purine metabolism	1	Diadenosine tetraphosphate; P1,P4-Bis(5'-adenosyl)tetraphosphate; AppppA;	C01260
		map04540	Gap junction	1	L-Glutamate; L-Glutamic acid; L-Glutaminic acid; Glutamate;;L-Glutamic acid	C00025
		map04727	GABAergic synapse	1	L-Glutamate; L-Glutamic acid; L-Glutaminic acid; Glutamate;;L-Glutamic acid	C00025
		map01522	Endocrine resistance	1	Estradiol-17beta; Estradiol; beta-Estradiol;;Estradiol	C00951
		map04122	Sulfur relay system	1	O-Acetyl-L-serine; O3-Acetyl-L-serine;;O-Acetylserine	C00979
		map05014	Amyotrophic lateral sclerosis (ALS)	1	L-Glutamate; L-Glutamic acid; L-Glutaminic acid; Glutamate;;L-Glutamic acid	C00025
		map00730	Thiamine metabolism	1	Thiamin monophosphate; Thiamine monophosphate; Thiamin phosphate; Thiamine phosphate; TMP;	C01081
		map00340	Histidine metabolism	1	L-Glutamate; L-Glutamic acid; L-Glutaminic acid; Glutamate;;L-Glutamic acid	C00025
		map05016	Huntington's disease	1	L-Glutamate; L-Glutamic acid; L-Glutaminic acid; Glutamate;;L-Glutamic acid	C00025
		map04976	Bile secretion	1	Cholic acid; Cholic acid; Cholate; 3alpha,7alpha,12alpha-Trihydroxy-5beta-cholanate; 3alpha,7alpha,12alpha-Trihydroxy-5beta-cholanic acid;	C00695
		map00100	Steroid biosynthesis	1	Calcidiol; 25-Hydroxyvitamin D3; Calcifediol; Calcifediol anhydrous; (3S,5Z,7E)-9,10-Seco-5,7,10(19)-cholestatriene-3,25-diol;;Calcidiol	C01561
		map04611	Platelet activation	1	Prostaglandin G2; Prostaglandin G2; PGG2;	C05956
		map00770	Pantothenate and CoA biosynthesis	1	CoA; Coenzyme A; CoA-SH;;Coenzyme A	C00010
		map05034	Alcoholism	1	L-Glutamate; L-Glutamic acid; L-Glutaminic acid; Glutamate;;L-Glutamic acid	C00025
		map04072	Phospholipase D signaling pathway	1	L-Glutamate; L-Glutamic acid; L-Glutaminic acid; Glutamate;;L-Glutamic acid	C00025
		map01040	Biosynthesis of unsaturated fatty acids	1	Linoleic acid; Linoleate; Linoleic acid; (9Z,12Z)-Octadecadienoic acid; 9-cis,12-cis-Octadecadienoate; 9-cis,12-cis-Octadecadienoic acid;	C01595
		map00220	Arginine biosynthesis	1	L-Glutamate; L-Glutamic acid; L-Glutaminic acid; Glutamate;;L-Glutamic acid	C00025
		map05230	Central carbon metabolism in cancer	1	L-Glutamate; L-Glutamic acid; L-Glutaminic acid; Glutamate;;L-Glutamic acid	C00025
		map00430	Taurine and hypotaurine metabolism	1	L-Glutamate; L-Glutamic acid; L-Glutaminic acid; Glutamate;;L-Glutamic acid	C00025
		map00250	Alanine, aspartate and glutamate metabolism	1	L-Glutamate; L-Glutamic acid; L-Glutaminic acid; Glutamate;;L-Glutamic acid	C00025
		map04925	Aldosterone synthesis and secretion	1	Aldosterone; 11beta,21-Dihydroxy-3,20-dioxo-4-pregnen-18-al;	C01780
	10 dpi	map01100	Metabolic pathways	98	7,8-Diaminononanoate; 7,8-Diaminopelargonic acid; DAPA;;Trehalose;Sucrose; alpha,alpha-Trehalose; alpha,alpha'-Trehalose; Trehalose;; Lactose; 1-beta-D-Galactopyranosyl-4-D-glucopyranose; beta-D-Gal-(1->4)-D-Glc; Milk sugar;; Cellobiose; 1-beta-D-Glucopyranosyl-4-D-glucopyranose;; Maltose; Malt sugar; alpha-D-Glucopyranosyl-(1->4)-D-glucopyranose;; Sucrose; Cane sugar; Saccharose; 1-alpha-D-Gluco…	C01037+C01083+C00089+C00243+C00185+C00208+C01935+C06400+C01898+C00163+C05956+C05962+C05964+C15700+C00082+C00643+C00331+C00534+C00294+C02061+C00931+C00864+C00371+C05594+C00588+C15545+C00386+C06423+C06459+C06564+C05557+C00255+C03287+C06070+C01674+C06758+C07214+C07209+C06728+C07084+C00601+C20782+C04780+C19615+C05122+C00951+C04672+C01226+C11857+C04785+C05955+C05957+C05954+C05953+C05958+C09024+C01595+…
		map00590	Arachidonic acid metabolism	35	2,3-Dinor-8-iso prostaglandin F1alpha; 2,3-Dinor-8-iso PGF1alpha;;Prostaglandin G2;6-Ketoprostaglandin E1; 6-Keto-prostaglandin E1; 6-Keto-PGE1;; 11-Dehydro-thromboxane B2;; Prostaglandin G2; PGG2;;Prostaglandin-c2; Prostaglandin J2; PGJ2;; Prostaglandin B2; PGB2;; Prostaglandin A2; PGA2; Medullin;; 12-Keto-leukotriene B4; 12-Keto-LTB4; 5-Hydroxy-12-oxo-Delta5,8,11,14-eicosapolyenoic acid;; Delta…	C14795+C05956+C05962+C05964+C05955+C05957+C05954+C05953+C05949+C05958+C14815+C14807+C05356+C04577+C02165+C14808+C14732+C14823+C14813+C14781+C14812+C14821+C04822+C05965+C14820+C00909+C14810+C05966+C14809+C13809+C14782+C14814+C14811+C00639+C05959
		map00140	Steroid hormone biosynthesis	35	3alpha,20alpha,21-Trihydroxy-5beta-pregnan-11-one;; Tetrahydrocorticosterone;; Estradiol-17alpha; 17alpha-Estradiol;;Estradiol; Estradiol-17beta; Estradiol; beta-Estradiol;;17a-Estradiol;5-Androstenediol;Etiocholanolone;Androsterone; 5beta-Dihydrotestosterone;; Dihydrotestosterone; 17beta-Hydroxyandrostan-3-one; Androstanolone; 17beta-Hydroxy-5alpha-androstan-3-one;;Dihydrotestosterone;5b-Dihydro…	C05483+C05476+C02537+C00951+C04295+C04373+C00523+C05293+C03917+C05498+C01176+C03205+C03747+C05138+C18038+C05485+C18040+C03852+C00410+C04518+C13713+C04555+C05294+C05139+C18075+C18045+C05291+C05487+C05475+C05478+C05499+C05501+C05480+C18041+C13712
		map00592	alpha-Linolenic acid metabolism	21	Methyl jasmonate; Methyl jasmonate; (-)-Methyl jasmonate;; (+)-7-Isomethyljasmonate;; Traumatic acid; (2E)-Dodecenedioic acid; Dodec-2-enedioic acid;;Traumatic acid;17-Hydroxylinolenic acid; 13(S)-HOT; (9Z,11E,15Z)-(13S)-Hydroxyoctadeca-9,11,15-trienoate; (9Z,11E,15Z)-(13S)-13-Hydroxyoctadeca-9,11,15-trienoic acid; (9Z,11E,13S,15Z)-13-Hydroxyoctadeca-9,11,15-trienoic acid; 13(S)-HOTrE;;Stearidoni…	C11512+C16318+C16308+C16346+C16316+C16300+C16342+C04780+C16326+C16344+C04672+C01226+C16319+C16320+C16324+C16325+C16321+C16341+C04785+C06427+C16343
		map04726	Serotonergic synapse	18	Prostaglandin G2; 11-Dehydro-thromboxane B2;; Prostaglandin G2; PGG2;;5-Hydroxy-L-tryptophan; 5-Hydroxy-L-tryptophan; Oxitriptan;;Prostaglandin-c2; Prostaglandin J2; PGJ2;; Prostaglandin B2; PGB2;; Prostaglandin A2; PGA2; Medullin;;Prostaglandin J2;Prostaglandin A2; Prostaglandin C2; PGC2;; 5(S)-HPETE; 5(S)-Hydroperoxy-6-trans-8,11,14-cis-eicosatetraenoic acid; (6E,8Z,11Z,14Z)-(5S)-5-Hydroperoxye…	C05956+C05964+C00643+C05955+C05957+C05954+C05953+C05356+C02165+C14823+C14812+C14821+C04822+C05965+C14820+C00909+C05966+C00639
		map02010	ABC transporters	15	Trehalose;Sucrose; alpha,alpha-Trehalose; alpha,alpha'-Trehalose; Trehalose;;Melibiose; Melibiose; 6-O-(alpha-D-Galactopyranosyl)-D-glucopyranose; D-Gal-alpha1->6D-Glucose;; Lactose; 1-beta-D-Galactopyranosyl-4-D-glucopyranose; beta-D-Gal-(1->4)-D-Glc; Milk sugar;; Cellobiose; 1-beta-D-Glucopyranosyl-4-D-glucopyranose;; Maltose; Malt sugar; alpha-D-Glucopyranosyl-(1->4)-D-glucopyranose;; Sucrose;…	C01083+C00089+C05402+C00243+C00185+C00208+C01682+C01935+C01835+C00492+C02160+C01674+C01946+C07663+C06687
		map00591	Linoleic acid metabolism	13	9-OxoODE;13-OxoODE; 9-OxoODE; 9-KODE; (10E,12Z)-9-Oxooctadeca-10,12-dienoic acid;; 13-OxoODE; 13-KODE; (9Z,11E)-13-Oxooctadeca-9,11-dienoic acid;;12,13-DHOME;9,10-DHOME; 9,10-DHOME; 9,10-DHOA; (12Z)-9,10-Dihydroxyoctadec-12-enoic acid;; 12,13-DHOME; 12,13-DHOA; (9Z)-12,13-Dihydroxyoctadec-9-enoic acid;;Bovinic acid; Linoleate; Linoleic acid; (9Z,12Z)-Octadecadienoic acid; 9-cis,12-cis-Octadecadie…	C14766+C14765+C14829+C14828+C04056+C01595+C14762+C14767+C14825+C14826+C06426+C07289+C03242
		map01040	Biosynthesis of unsaturated fatty acids	11	Linoleate; Linoleic acid; (9Z,12Z)-Octadecadienoic acid; 9-cis,12-cis-Octadecadienoate; 9-cis,12-cis-Octadecadienoic acid;;Linoleic acid; (9Z,12Z,15Z)-Octadecatrienoic acid; alpha-Linolenic acid; 9,12,15-Octadecatrienoic acid; Linolenate; alpha-Linolenate;; (6Z,9Z,12Z)-Octadecatrienoic acid; 6,9,12-Octadecatrienoic acid; gamma-Linolenic acid; Gamolenic acid;;Palmitic acid;Alpha-Linolenic acid; He…	C01595+C06427+C06426+C00249+C16522+C03242+C06429+C00712+C16513+C16527+C16525
		map00120	Primary bile acid biosynthesis	10	Taurocholate; Taurocholic acid; Cholyltaurine;; 5beta-Cyprinolsulfate;; 7alpha-Hydroxycholest-4-en-3-one;; (24S)-Cholest-5-ene-3beta,7alpha,24-triol; 5-Cholesten-3beta,7alpha,24(S)-triol;; Cholest-5-ene-3beta,7alpha,25-triol; 7alpha,25-Dihydroxycholesterol; 5-Cholesten-3beta,7alpha,25-triol; 3beta,7alpha,25-Trihydroxycholest-5-ene;; 7alpha,27-Dihydroxycholesterol; Cholest-5-ene-3beta,7alpha,26-tr…	C05122+C05468+C05455+C15518+C15520+C06341+C05445+C05453+C01301+C04554
		map00500	Starch and sucrose metabolism	10	Levanbiose;;Trehalose;Sucrose; alpha,alpha-Trehalose; alpha,alpha'-Trehalose; Trehalose;;Isomaltose; Isomaltose; Brachiose;; Cellobiose; 1-beta-D-Glucopyranosyl-4-D-glucopyranose;; Maltose; Malt sugar; alpha-D-Glucopyranosyl-(1->4)-D-glucopyranose;; Sucrose; Cane sugar; Saccharose; 1-alpha-D-Glucopyranosyl-2-beta-D-fructofuranoside;;Maltotriose; Levan; (2,6-beta-D-Fructosyl)n; Levan n; 2,6-beta-D…	C01725+C01083+C00089+C00252+C00185+C00208+C01935+C06215+C06400+C01898
		map04913	Ovarian steroidogenesis	8	Estradiol; Estradiol-17beta; Estradiol; beta-Estradiol;; 5(S)-HPETE; 5(S)-Hydroperoxy-6-trans-8,11,14-cis-eicosatetraenoic acid; (6E,8Z,11Z,14Z)-(5S)-5-Hydroperoxyeicosa-6,8,11,14-tetraenoate; (6E,8Z,11Z,14Z)-(5S)-5-Hydroperoxyeicosa-6,8,11,14-tetraenoic acid; (5S,6E,8Z,11Z,14Z)-5-Hydroperoxyicosa-6,8,11,14-tetraenoate;;5(S)-Hydroperoxyeicosatetraenoic acid; 15(S)-HPETE; (5Z,8Z,11Z,13E)-(15S)-15-…	C00951+C05356+C05966+C04295+C01176+C05138+C00410+C00639
		map04976	Bile secretion	8	Acetaminophen; Paracetamol;;Acetaminophen;Valproic acid; Valproic acid;; BQ 123; Cyclo[D-trp-D-asp-L-pro-D-val-L-leu];; Taurocholate; Taurocholic acid; Cholyltaurine;;Fexofenadine; Fexofenadine; 4-(1-Hydroxy-4-(4-(hydroxydiphenylmethyl)-1-piperidinyl)butyl)-alpha,alpha-dimethylbenzeneacetic acid;; Leukotriene B4; (6Z,8E,10E,14Z)-(5S,12R)-5,12-Dihydroxyeicosa-6,8,10,14-tetraenoate; (6Z,8E,10E,14Z)…	C06804+C07185+C11587+C05122+C06999+C02165+C00639+C04555
		map00052	Galactose metabolism	8	alpha-D-Galactosyl-(1->3)-1D-myo-inositol; O-alpha-D-Galactosyl-(1->3)-1D-myo-inositol; 3-O-alpha-D-Galactosyl-1D-myo-inositol; 1-alpha-D-Galactosyl-myo-inositol; Galactinol;;Sucrose;Melibiose; Epimelibiose; 6-O-(alpha-D-Galactopyranosyl)-D-mannopyranose;; Melibiose; 6-O-(alpha-D-Galactopyranosyl)-D-glucopyranose; D-Gal-alpha1->6D-Glucose;; Lactose; 1-beta-D-Galactopyranosyl-4-D-glucopyranose; be…	C01235+C00089+C05402+C05400+C00243+C05404+C00492+C01613
		map00524	Neomycin, kanamycin and gentamicin biosynthesis	6	6'-Oxo-G418;; Gentamicin X2;; Neamine; Neomycin A;; 2'-Deamino-2'-hydroxy-6'-dehydroparomamine;; 2'''-N-Acetyl-6'''-deamino-6'''-hydroxyparomomycin II;; 2'-N-Acetylparomamine;	C21268+C17702+C01441+C20351+C21261+C17582
		map05200	Pathways in cancer	6	2-Amino-1-methyl-6-phenylimidazo[4,5-b]pyridine; PhIP;;1-Methyl-6-phenyl-1H-imidazo[4,5-b]pyridin-2-amine;Estradiol; Estradiol-17beta; Estradiol; beta-Estradiol;; Dihydrotestosterone; 17beta-Hydroxyandrostan-3-one; Androstanolone; 17beta-Hydroxy-5alpha-androstan-3-one;;Dihydrotestosterone;9-cis-Retinoic acid;all-trans-Retinoic acid; 9-cis-Retinoic acid;; Retinoate; Retinoic acid; Vitamin A acid; …	C16038+C00951+C03917+C15493+C00777+C00410
		map00350	Tyrosine metabolism	5	3-Amino-3-(4-hydroxyphenyl)propanoate; beta-Tyrosine;;Beta-Tyrosine; L-Tyrosine; (S)-3-(p-Hydroxyphenyl)alanine; (S)-2-Amino-3-(p-hydroxyphenyl)propionic acid; Tyrosine;;L-Tyrosine;Hydroxyphenylacetylglycine; p-Hydroxyphenylacetylglycine; 4-Hydroxyphenylacetylglycine;; 3-Methoxy-4-hydroxyphenylethyleneglycol;;Vanylglycol; 4-Hydroxyphenylethanol; Tyrosol;;Tyrosol	C04368+C00082+C05596+C05594+C06044
		map04973	Carbohydrate digestion and absorption	5	Sucrose; Lactose; 1-beta-D-Galactopyranosyl-4-D-glucopyranose; beta-D-Gal-(1->4)-D-Glc; Milk sugar;; Maltose; Malt sugar; alpha-D-Glucopyranosyl-(1->4)-D-glucopyranose;; Sucrose; Cane sugar; Saccharose; 1-alpha-D-Glucopyranosyl-2-beta-D-fructofuranoside;; Maltotriose; Amylotriose;; Propanoate; Propionate; Propanoic acid; Propionic acid;;Propionic acid	C00089+C00243+C00208+C01835+C00163
		map04750	Inflammatory mediator regulation of TRP channels	5	(-)-Menthol; L-Menthol;;Menthol; Leukotriene B4; (6Z,8E,10E,14Z)-(5S,12R)-5,12-Dihydroxyeicosa-6,8,10,14-tetraenoate; (6Z,8E,10E,14Z)-(5S,12R)-5,12-Dihydroxyicosa-6,8,10,14-tetraenoate; LTB4;; 12(S)-HPETE; (5Z,8Z,10E,14Z)-(12S)-12-Hydroperoxyicosa-5,8,10,14-tetraenoic acid; (5Z,8Z,10E,14Z)-(12S)-12-Hydroperoxyicosa-5,8,10,14-tetraenoate; 12-Hydroperoxyeicosatetraenoate; 12-Hydroperoxyicosatetraen…	C00400+C02165+C05965+C05966+C11695
		map00380	Tryptophan metabolism	5	5-Hydroxy-L-tryptophan; Indolepyruvate; Indolepyruvic acid; (Indol-3-yl)pyruvate; Indole-3-pyruvate; 3-(Indol-3-yl)pyruvate;;Indolepyruvate; 5-Hydroxy-L-tryptophan; Oxitriptan;;N-Methyltryptamine; N-Methyltryptamine; N-Methylindoleethylamine; 1-Methyl-2-(3-indolyl)ethylamine;;Tryptophanol; Indole-3-ethanol; Tryptophol;; Formylanthranilate; N-Formylanthranilate; 2-(Formylamino)-benzoic acid;;Formy…	C00643+C00331+C06213+C00955+C05653
		map01210	2-Oxocarboxylic acid metabolism	4	Glucoputranjivin; 1-Methylethyl glucosinolate;; L-Tyrosine; (S)-3-(p-Hydroxyphenyl)alanine; (S)-2-Amino-3-(p-hydroxyphenyl)propionic acid; Tyrosine;;L-Tyrosine; (E)-4-Hydroxyphenylacetaldehyde oxime; (E)-[4-Hydroxyphenylacetaldehyde oxime];; Dihomomethionine; L-Dihomomethionine;	C08418+C00082+C04350+C17217
		map04080	Neuroactive ligand-receptor interaction	4	Leukotriene B4; (6Z,8E,10E,14Z)-(5S,12R)-5,12-Dihydroxyeicosa-6,8,10,14-tetraenoate; (6Z,8E,10E,14Z)-(5S,12R)-5,12-Dihydroxyicosa-6,8,10,14-tetraenoate; LTB4;;Leukotriene B4; Prostaglandin F2alpha; (5Z,13E)-(15S)-9alpha,11alpha,15-Trihydroxyprosta-5,13-dienoate; (+)-Prostaglandin F2a; 7-[3,5-Dihydroxy-2-(3-hydroxy-1-octenyl)cyclopentyl]-5-heptenoic acid; 9a,11a-PGF2; Amoglandin; Cyclosin; Dinopro…	C02165+C00639+C13856+C11695
		map00982	Drug metabolism - cytochrome P450	4	Felbamate; Felbamate;;2-Amino-3-methylbenzoate; 2-Amino-3-methylbenzoate;;3-Carbamoyl-2-phenylpropionic acid; 3-Carbamoyl-2-phenylpropionic acid;;Valproic acid; Valproic acid;	C07501+C16571+C16591+C07185
		map05204	Chemical carcinogenesis	4	N-Hydroxy-MeIQx;; gamma-Hydroxy-3-pyridinebutanoate;;4-Hydroxy-4-(3-pyridyl)-butanoic acid; 2-Amino-1-methyl-6-phenylimidazo[4,5-b]pyridine; PhIP;;1-Methyl-6-phenyl-1H-imidazo[4,5-b]pyridin-2-amine;(1aalpha,2beta,3alpha,11calpha)-1a,2,3,11c-Tetrahydro-6,11-dimethylbenzo[6,7]phenanthro[3,4-b]oxirene-2,3-diol; (1aalpha,2beta,3alpha,11calpha)-1a,2,3,11c-Tetrahydro-6,11-dimethylbenzo[6,7]phenanthro[3…	C20291+C19579+C16038+C19559
		map00640	Propanoate metabolism	4	Lactaldehyde; Methyl acetate; Devoton; Tereton;; (S)-Lactaldehyde; L-Lactaldehyde; L-2-Hydroxypropionaldehyde;; Hydroxyacetone; Acetol; 1-Hydroxy-2-propanone; 2-Ketopropyl alcohol; Acetone alcohol; Pyruvinalcohol; Pyruvic alcohol; Methylketol;; Propanoate; Propionate; Propanoic acid; Propionic acid;;Methyl acetate;Propionic acid;Hydroxyacetone	C00424+C17530+C05235+C00163
		map03320	PPAR signaling pathway	4	13-HODE;Alpha-dimorphecolic acid; 9(S)-HODE; (9S)-Hydroxyoctadecadienoic acid; (10E,12Z)-(9S)-9-Hydroxyoctadeca-10,12-dienoic acid;;13S-hydroxyoctadecadienoic acid; 13(S)-HODE; (13S)-Hydroxyoctadecadienoic acid; (9Z,11E)-(13S)-13-Hydroxyoctadeca-9,11-dienoic acid;; Leukotriene B4; (6Z,8E,10E,14Z)-(5S,12R)-5,12-Dihydroxyeicosa-6,8,10,14-tetraenoate; (6Z,8E,10E,14Z)-(5S,12R)-5,12-Dihydroxyicosa-6,8…	C14762+C14767+C02165+C15493
		map05215	Prostate cancer	4	2-Amino-1-methyl-6-phenylimidazo[4,5-b]pyridine; PhIP;;1-Methyl-6-phenyl-1H-imidazo[4,5-b]pyridin-2-amine;Estradiol; Estradiol-17beta; Estradiol; beta-Estradiol;; Dihydrotestosterone; 17beta-Hydroxyandrostan-3-one; Androstanolone; 17beta-Hydroxy-5alpha-androstan-3-one;;Dihydrotestosterone;Progesterone; Progesterone; 4-Pregnene-3,20-dione;	C16038+C00951+C03917+C00410
		map00061	Fatty acid biosynthesis	4	Octanoic acid; Caprylic acid; Octylic acid;;octanoate radical;Caprylic acid;Palmitoleic acid; (9Z)-Hexadecenoic acid; Palmitoleic acid; cis-9-Hexadecenoic acid; (9Z)-Hexadec-9-enoate;;Palmitic acid; Hexadecanoic acid; Hexadecanoate; Hexadecylic acid; Palmitic acid; Palmitate; Cetylic acid;; (9Z)-Octadecenoic acid; (Z)-Octadec-9-enoic acid; Oleate; Oleic acid;;Oleic acid	C06423+C08362+C00249+C00712
		map00860	Porphyrin and chlorophyll metabolism	3	Porphobilinogen; Porphobilinogen;; 8-Ethyl-12-methyl-3-vinylbacteriochlorophyllide d;; Biliverdin; Biliverdin IX alpha;;Biliverdin	C00931+C18157+C00500
		map00980	Metabolism of xenobiotics by cytochrome P450	3	gamma-Hydroxy-3-pyridinebutanoate;;4-Hydroxy-4-(3-pyridyl)-butanoic acid; 1-Naphthylamine;;(1aalpha,2beta,3alpha,11calpha)-1a,2,3,11c-Tetrahydro-6,11-dimethylbenzo[6,7]phenanthro[3,4-b]oxirene-2,3-diol; (1aalpha,2beta,3alpha,11calpha)-1a,2,3,11c-Tetrahydro-6,11-dimethylbenzo[6,7]phenanthro[3,4-b]oxirene-2,3-diol;	C19579+C14790+C19559
		map00830	Retinol metabolism	3	4-Oxoretinol;;9-cis-Retinoic acid;all-trans-Retinoic acid;4-Oxoretinol; 9-cis-Retinoic acid;; Retinoate; Retinoic acid; Vitamin A acid; all-trans-Retinoate; Acide retinoique (French) (DSL); Tretinoine (French) (EINECS); 3,7-Dimethyl-9-(2,6,6-trimethyl-1-cyclohexene-1-yl)-2,4,6,8-nonatetraenoic acid (ECL); (all-E)-3,7-Dimethyl-9-(2,6,6-trimethyl-1-cyclohexen-1-yl)-2,4,6,8-nonatetraenoic acid; beta…	C16683+C15493+C00777
		map04977	Vitamin digestion and absorption	3	Pyridoxamine; Pyridoxamine; PM;;Pantothenic acid; Pantothenate; Pantothenic acid; (R)-Pantothenate;; Riboflavin; Lactoflavin; 7,8-Dimethyl-10-ribitylisoalloxazine; Vitamin B2;;Riboflavin	C00534+C00864+C00255
		map00330	Arginine and proline metabolism	3	Nopaline; D-Nopaline; N2-(D-1,3-Dicarboxypropyl)-L-arginine; N-[(1S)-4-Carbamimidamido-1-carboxybutyl]-D-glutamic acid;; gamma-Glutamyl-gamma-aminobutyraldehyde;; L-Glutamyl 5-phosphate; L-Glutamate 5-phosphate;;L-Glutamic acid 5-phosphate	C01682+C15700+C03287
		map04917	Prolactin signaling pathway	3	L-Tyrosine; (S)-3-(p-Hydroxyphenyl)alanine; (S)-2-Amino-3-(p-hydroxyphenyl)propionic acid; Tyrosine;;L-Tyrosine;Estradiol; Estradiol-17beta; Estradiol; beta-Estradiol;;Progesterone; Progesterone; 4-Pregnene-3,20-dione;	C00082+C00951+C00410
		map00130	Ubiquinone and other terpenoid-quinone biosynthesis	3	L-Tyrosine; (S)-3-(p-Hydroxyphenyl)alanine; (S)-2-Amino-3-(p-hydroxyphenyl)propionic acid; Tyrosine;;L-Tyrosine; 3''-Hydroxy-geranylhydroquinone;;2-Polyprenyl-6-methoxyphenol; 2-Polyprenyl-6-methoxyphenol;	C00082+C18132+C17552
		map00520	Amino sugar and nucleotide sugar metabolism	3	2,4-Diacetamido-2,4,6-trideoxy-D-mannopyranose; 2,4-Diacetamido-2,4,6-trideoxy-alpha-D-mannopyranose;; 2,4-Bis(acetamido)-2,4,6-trideoxy-beta-L-altropyranose;;N,N'-diacetylchitobiose; Chitobiose; Diacetylchitobiose; N,N'-Diacetylchitobiose;	C20424+C19972+C01674
		map00750	Vitamin B6 metabolism	3	Pyridoxamine; Pyridoxamine; PM;; 4-Pyridoxolactone; 4-Pyridoxic acid lactone;; 5-Pyridoxolactone;;4-Pyridoxolactone;5-Pyridoxolactone	C00534+C00971+C06052
		map00440	Phosphonate and phosphinate metabolism	3	Hydroxymethylphosphonate; P-(Hydroxymethyl)-phosphonic acid;; N-Trimethyl-2-aminoethylphosphonate; 2-Trimethylaminoethylphosphonate;; N-Acetylbialaphos; N-Acetylphosphinothricin tripeptide;	C06455+C06459+C17951
		map00360	Phenylalanine metabolism	3	L-Tyrosine; (S)-3-(p-Hydroxyphenyl)alanine; (S)-2-Amino-3-(p-hydroxyphenyl)propionic acid; Tyrosine;;L-Tyrosine; cis-3-(Carboxy-ethyl)-3,5-cyclo-hexadiene-1,2-diol; cis-3-(2-Carboxy-ethyl)-3,5-cyclo-hexadiene-1,2-diol; 3-(cis-5,6-Dihydroxycyclohexa-1,3-dien-1-yl)propanoate;; Phenylacetaldehyde; alpha-Tolualdehyde;;Phenylacetaldehyde	C00082+C11588+C00601
		map05222	Small cell lung cancer	2	9-cis-Retinoic acid;all-trans-Retinoic acid; 9-cis-Retinoic acid;; Retinoate; Retinoic acid; Vitamin A acid; all-trans-Retinoate; Acide retinoique (French) (DSL); Tretinoine (French) (EINECS); 3,7-Dimethyl-9-(2,6,6-trimethyl-1-cyclohexene-1-yl)-2,4,6,8-nonatetraenoic acid (ECL); (all-E)-3,7-Dimethyl-9-(2,6,6-trimethyl-1-cyclohexen-1-yl)-2,4,6,8-nonatetraenoic acid; beta-Retinoic acid; AGN 100335;…	C15493+C00777
		map05224	Breast cancer	2	Estradiol; Estradiol-17beta; Estradiol; beta-Estradiol;;Progesterone; Progesterone; 4-Pregnene-3,20-dione;	C00951+C00410
		map00071	Fatty acid degradation	2	L-Palmitoylcarnitine;;L-Palmitoylcarnitine;Palmitic acid; Hexadecanoic acid; Hexadecanoate; Hexadecylic acid; Palmitic acid; Palmitate; Cetylic acid;	C02990+C00249
		map00310	Lysine degradation	2	N6,N6,N6-Trimethyl-L-lysine;;N6,N6,N6-Trimethyl-L-lysine;N6-Acetyl-L-lysine; N6-Acetyl-L-lysine;	C03793+C02727
		map00620	Pyruvate metabolism	2	Lactaldehyde; (R)-Lactaldehyde; D-Lactaldehyde; D-2-Hydroxypropionaldehyde;; (S)-Lactaldehyde; L-Lactaldehyde; L-2-Hydroxypropionaldehyde;;D-Lactaldehyde	C00424+C00937
		map00340	Histidine metabolism	2	Carnosine; Nalpha-(beta-alanyl)-L-histidine;;Carnosine; N-Carbamyl-L-glutamate; Carglumic acid;;Carglumic acid	C00386+C05829
		map01230	Biosynthesis of amino acids	2	L-Tyrosine; (S)-3-(p-Hydroxyphenyl)alanine; (S)-2-Amino-3-(p-hydroxyphenyl)propionic acid; Tyrosine;;L-Tyrosine; L-Glutamyl 5-phosphate; L-Glutamate 5-phosphate;;L-Glutamic acid 5-phosphate	C00082+C03287
		map00051	Fructose and mannose metabolism	2	Lactaldehyde; (S)-Lactaldehyde; L-Lactaldehyde; L-2-Hydroxypropionaldehyde;; 2-O-(alpha-D-Mannosyl)-D-glycerate; alpha-Mannosylglycerate; 2-O-(alpha-D-Mannopyranosyl)-D-glycerate;	C00424+C11544
		map04723	Retrograde endocannabinoid signaling	2	2-Arachidonylglycerol; 2-Arachidonoylglycerol; 2-Arachidonoyl-sn-glycerol; 2-AG;; Anandamide; Arachidonylethanolamide; N-(5Z,8Z,11Z,14Z-icosatetraenoyl)-ethanolamide; AEA;;Anandamide	C13856+C11695
		map05226	Gastric cancer	2	9-cis-Retinoic acid;all-trans-Retinoic acid; 9-cis-Retinoic acid;; Retinoate; Retinoic acid; Vitamin A acid; all-trans-Retinoate; Acide retinoique (French) (DSL); Tretinoine (French) (EINECS); 3,7-Dimethyl-9-(2,6,6-trimethyl-1-cyclohexene-1-yl)-2,4,6,8-nonatetraenoic acid (ECL); (all-E)-3,7-Dimethyl-9-(2,6,6-trimethyl-1-cyclohexen-1-yl)-2,4,6,8-nonatetraenoic acid; beta-Retinoic acid; AGN 100335;…	C15493+C00777
		map05223	Non-small cell lung cancer	2	9-cis-Retinoic acid;all-trans-Retinoic acid; 9-cis-Retinoic acid;; Retinoate; Retinoic acid; Vitamin A acid; all-trans-Retinoate; Acide retinoique (French) (DSL); Tretinoine (French) (EINECS); 3,7-Dimethyl-9-(2,6,6-trimethyl-1-cyclohexene-1-yl)-2,4,6,8-nonatetraenoic acid (ECL); (all-E)-3,7-Dimethyl-9-(2,6,6-trimethyl-1-cyclohexen-1-yl)-2,4,6,8-nonatetraenoic acid; beta-Retinoic acid; AGN 100335;…	C15493+C00777
		map00410	beta-Alanine metabolism	2	Pantothenic acid; Pantothenate; Pantothenic acid; (R)-Pantothenate;; Carnosine; Nalpha-(beta-alanyl)-L-histidine;;Carnosine	C00864+C00386
		map00760	Nicotinate and nicotinamide metabolism	2	Propanoate; Propionate; Propanoic acid; Propionic acid;;Propionic acid; 6-Hydroxypseudooxynicotine; 1-(6-Hydroxypyridin-3-yl)-4-(methylamino)butan-1-one;;6-Hydroxypseudooxynicotine	C00163+C01297
		map01212	Fatty acid metabolism	2	L-Palmitoylcarnitine;;L-Palmitoylcarnitine;Palmitic acid; Hexadecanoic acid; Hexadecanoate; Hexadecylic acid; Palmitic acid; Palmitate; Cetylic acid;	C02990+C00249
		map04742	Taste transduction	2	Sucrose; Maltose; Malt sugar; alpha-D-Glucopyranosyl-(1->4)-D-glucopyranose;; Sucrose; Cane sugar; Saccharose; 1-alpha-D-Glucopyranosyl-2-beta-D-fructofuranoside;	C00089+C00208
		map00430	Taurine and hypotaurine metabolism	2	N-Phosphotaurocyamine; Taurocyamine phosphate; N(omega)-Phosphotaurocyamine;; Taurocholate; Taurocholic acid; Cholyltaurine;	C03149+C05122
		map04925	Aldosterone synthesis and secretion	2	11-Deoxycorticosterone; Deoxycorticosterone; Cortexone; 21-Hydroxy-4-pregnene-3,20-dione; Desoxycortone; DOC;;Deoxycorticosterone;Progesterone; Progesterone; 4-Pregnene-3,20-dione;	C03205+C00410
		map00230	Purine metabolism	2	Diadenosine tetraphosphate; P1,P4-Bis(5'-adenosyl)tetraphosphate; AppppA;; Inosine;;Inosine	C01260+C00294
		map04672	Intestinal immune network for IgA production	2	9-cis-Retinoic acid;all-trans-Retinoic acid; 9-cis-Retinoic acid;; Retinoate; Retinoic acid; Vitamin A acid; all-trans-Retinoate; Acide retinoique (French) (DSL); Tretinoine (French) (EINECS); 3,7-Dimethyl-9-(2,6,6-trimethyl-1-cyclohexene-1-yl)-2,4,6,8-nonatetraenoic acid (ECL); (all-E)-3,7-Dimethyl-9-(2,6,6-trimethyl-1-cyclohexen-1-yl)-2,4,6,8-nonatetraenoic acid; beta-Retinoic acid; AGN 100335;…	C15493+C00777
		map04974	Protein digestion and absorption	2	Propanoate; Propionate; Propanoic acid; Propionic acid;;Propionic acid; L-Tyrosine; (S)-3-(p-Hydroxyphenyl)alanine; (S)-2-Amino-3-(p-hydroxyphenyl)propionic acid; Tyrosine;;L-Tyrosine	C00163+C00082
		map04916	Melanogenesis	1	L-Tyrosine; (S)-3-(p-Hydroxyphenyl)alanine; (S)-2-Amino-3-(p-hydroxyphenyl)propionic acid; Tyrosine;;L-Tyrosine	C00082
		map04961	Endocrine and other factor-regulated calcium reabsorption	1	Estradiol; Estradiol-17beta; Estradiol; beta-Estradiol;	C00951
		map05230	Central carbon metabolism in cancer	1	L-Tyrosine; (S)-3-(p-Hydroxyphenyl)alanine; (S)-2-Amino-3-(p-hydroxyphenyl)propionic acid; Tyrosine;;L-Tyrosine	C00082
		map00062	Fatty acid elongation	1	Palmitic acid; Hexadecanoic acid; Hexadecanoate; Hexadecylic acid; Palmitic acid; Palmitate; Cetylic acid;	C00249
		map04920	Adipocytokine signaling pathway	1	9-cis-Retinoic acid; 9-cis-Retinoic acid;	C15493
		map00561	Glycerolipid metabolism	1	3-Hydroxypropanal; 3-Hydroxypropanal;	C00969
		map05030	Cocaine addiction	1	L-Tyrosine; (S)-3-(p-Hydroxyphenyl)alanine; (S)-2-Amino-3-(p-hydroxyphenyl)propionic acid; Tyrosine;;L-Tyrosine	C00082
		map00770	Pantothenate and CoA biosynthesis	1	Pantothenic acid; Pantothenate; Pantothenic acid; (R)-Pantothenate;	C00864
		map05231	Choline metabolism in cancer	1	Phosphorylcholine; Choline phosphate; Phosphorylcholine; Phosphocholine; O-Phosphocholine;	C00588
		map00740	Riboflavin metabolism	1	Riboflavin; Lactoflavin; 7,8-Dimethyl-10-ribitylisoalloxazine; Vitamin B2;;Riboflavin	C00255
		map04921	Oxytocin signaling pathway	1	Prostaglandin F2alpha; (5Z,13E)-(15S)-9alpha,11alpha,15-Trihydroxyprosta-5,13-dienoate; (+)-Prostaglandin F2a; 7-[3,5-Dihydroxy-2-(3-hydroxy-1-octenyl)cyclopentyl]-5-heptenoic acid; 9a,11a-PGF2; Amoglandin; Cyclosin; Dinoprost; Enzaprost; Enzaprost F; Panacelan; PGF2a; 9,11,15-Trihydroxy-(5Z,9a,11a,13E,15S)-prosta-5,13-dien-1-oic acid; Prostaglandin F2a; Prostin F 2 alpha; Protamodin; U 14583; (5…	C00639
		map00730	Thiamine metabolism	1	L-Tyrosine; (S)-3-(p-Hydroxyphenyl)alanine; (S)-2-Amino-3-(p-hydroxyphenyl)propionic acid; Tyrosine;;L-Tyrosine	C00082
		map04114	Oocyte meiosis	1	Progesterone; Progesterone; 4-Pregnene-3,20-dione;	C00410
		map04728	Dopaminergic synapse	1	L-Tyrosine; (S)-3-(p-Hydroxyphenyl)alanine; (S)-2-Amino-3-(p-hydroxyphenyl)propionic acid; Tyrosine;;L-Tyrosine	C00082
		map04216	Ferroptosis	1	Adrenic acid; 7,10,13,16-Docosatetraenoic acid; (7Z,10Z,13Z,16Z)-Docosa-7,10,13,16-tetraenoic acid; Adrenic acid;	C16527
		map04659	Th17 cell differentiation	1	all-trans-Retinoic acid; Retinoate; Retinoic acid; Vitamin A acid; all-trans-Retinoate; Acide retinoique (French) (DSL); Tretinoine (French) (EINECS); 3,7-Dimethyl-9-(2,6,6-trimethyl-1-cyclohexene-1-yl)-2,4,6,8-nonatetraenoic acid (ECL); (all-E)-3,7-Dimethyl-9-(2,6,6-trimethyl-1-cyclohexen-1-yl)-2,4,6,8-nonatetraenoic acid; beta-Retinoic acid; AGN 100335; all-(E)-Retinoic acid; all-trans-beta-Ret…	C00777
		map05012	Parkinson's disease	1	L-Tyrosine; (S)-3-(p-Hydroxyphenyl)alanine; (S)-2-Amino-3-(p-hydroxyphenyl)propionic acid; Tyrosine;;L-Tyrosine	C00082
		map00564	Glycerophospholipid metabolism	1	Phosphorylcholine; Choline phosphate; Phosphorylcholine; Phosphocholine; O-Phosphocholine;	C00588
		map00970	Aminoacyl-tRNA biosynthesis	1	L-Tyrosine; (S)-3-(p-Hydroxyphenyl)alanine; (S)-2-Amino-3-(p-hydroxyphenyl)propionic acid; Tyrosine;;L-Tyrosine	C00082
		map04915	Estrogen signaling pathway	1	Estradiol; Estradiol-17beta; Estradiol; beta-Estradiol;	C00951
		map00400	Phenylalanine, tyrosine and tryptophan biosynthesis	1	L-Tyrosine; (S)-3-(p-Hydroxyphenyl)alanine; (S)-2-Amino-3-(p-hydroxyphenyl)propionic acid; Tyrosine;;L-Tyrosine	C00082
		map00900	Terpenoid backbone biosynthesis	1	2-trans,6-trans-Farnesal; 2-trans,6-trans-Farnesal; trans,trans-Farnesal; Farnesal; (2E,6E)-3,7,11-Trimethyl-2,6,10-dodecatrienal; (2E,6E)-Farnesal;	C03461
		map04914	Progesterone-mediated oocyte maturation	1	Progesterone; Progesterone; 4-Pregnene-3,20-dione;	C00410
		map04614	Renin-angiotensin system	1	Angiotensin (5-8); Angiotensin-(5-8);	C20972
		map05034	Alcoholism	1	L-Tyrosine; (S)-3-(p-Hydroxyphenyl)alanine; (S)-2-Amino-3-(p-hydroxyphenyl)propionic acid; Tyrosine;;L-Tyrosine	C00082
		map04072	Phospholipase D signaling pathway	1	Prostaglandin F2alpha; (5Z,13E)-(15S)-9alpha,11alpha,15-Trihydroxyprosta-5,13-dienoate; (+)-Prostaglandin F2a; 7-[3,5-Dihydroxy-2-(3-hydroxy-1-octenyl)cyclopentyl]-5-heptenoic acid; 9a,11a-PGF2; Amoglandin; Cyclosin; Dinoprost; Enzaprost; Enzaprost F; Panacelan; PGF2a; 9,11,15-Trihydroxy-(5Z,9a,11a,13E,15S)-prosta-5,13-dien-1-oic acid; Prostaglandin F2a; Prostin F 2 alpha; Protamodin; U 14583; (5…	C00639
		map00780	Biotin metabolism	1	7,8-Diaminononanoate; 7,8-Diaminopelargonic acid; DAPA;	C01037
		map00100	Steroid biosynthesis	1	Calcidiol; 25-Hydroxyvitamin D3; Calcifediol; Calcifediol anhydrous; (3S,5Z,7E)-9,10-Seco-5,7,10(19)-cholestatriene-3,25-diol;;Calcidiol	C01561
		map01522	Endocrine resistance	1	Estradiol; Estradiol-17beta; Estradiol; beta-Estradiol;	C00951
		map04611	Platelet activation	1	Prostaglandin G2; Prostaglandin G2; PGG2;	C05956
		map04979	Cholesterol metabolism	1	Taurocholate; Taurocholic acid; Cholyltaurine;	C05122
		map04922	Glucagon signaling pathway	1	Glycogen; Glycogen;	C00182
		map04024	cAMP signaling pathway	1	N-Oleoylethanolamine; Oleoylethanolamide; OEA;	C20792
		map05031	Amphetamine addiction	1	L-Tyrosine; (S)-3-(p-Hydroxyphenyl)alanine; (S)-2-Amino-3-(p-hydroxyphenyl)propionic acid; Tyrosine;;L-Tyrosine	C00082
		map05152	Tuberculosis	1	Calcidiol; 25-Hydroxyvitamin D3; Calcifediol; Calcifediol anhydrous; (3S,5Z,7E)-9,10-Seco-5,7,10(19)-cholestatriene-3,25-diol;;Calcidiol	C01561
	36 dpi	map01100	Metabolic pathways	46	Urate; Uric acid;;Uric acid; Succinate; Succinic acid; Butanedionic acid; Ethylenesuccinic acid;;Succinic acid; Hypoxanthine; Purine-6-ol;;Hypoxanthine; Kaur-16-en-18-oic acid; (-)-Kaur-16-en-19-oic acid; Kaurenic acid; Kaurenoic acid; ent-Kaur-16(17)-en-19-oic acid; ent-Kaurenoic acid; ent-Kaur-16-en-19-oic acid; ent-Kaur-16-en-19-oate;; Abietate; Abietic acid;; Thiamin monophosphate; Thiamine m…	C00366+C00042+C00262+C11874+C06087+C01081+C00178+C01455+C15700+C00082+C06730+C02923+C06204+C06203+C00826+C05635+C16479+C16480+C16482+C06423+C06459+C01542+C01468+C07213+C06757+C11348+C07083+C07216+C06102+C00671+C00233+C06007+C00522+C00418+C03114+C00637+C00509+C03648+C06561+C01137+C06070+C02528+C13453+C06564+C05557+C00486
		map01210	2-Oxocarboxylic acid metabolism	9	(R)-(Homo)3-citrate; (R)-2-Hydroxy-1,2,6-hexanetricarboxylate; (R)-2-Hydroxy-1,2,6-hexanetricarboxylic acid;; (-)-threo-Iso(homo)3-citrate; (-)-threo-1-Hydroxy-1,2,6-hexanetricarboxylic acid; 1-Hydroxyhexane-1,2,6-tricarboxylate; threo-(Homo)3-isocitrate;;L-Tyrosine; L-Tyrosine; (S)-3-(p-Hydroxyphenyl)alanine; (S)-2-Amino-3-(p-hydroxyphenyl)propionic acid; Tyrosine;; (S)-3-Methyl-2-oxopentanoic a…	C16598+C16600+C00082+C00671+C00233+C06007+C17222+C17223+C20582
		map00980	Metabolism of xenobiotics by cytochrome P450	9	Benzo[a]pyrene; Benzo[a]pyrene; Benzpyrene;;4-Hydroxy-4-(3-pyridyl)-butanoic acid; gamma-Hydroxy-3-pyridinebutanoate;; 9-Hydroxybenzo[a]pyrene;; Benzo[a]pyrene-7,8-diol; Benzo[a]pyrene-7,8-dihydrodiol;;Benzo[a]pyrene-7,8-oxide; Benzo[a]pyrene-4,5-oxide; Benzo[a]pyrene-4,5-epoxide;; Benzo[a]pyrene-9,10-oxide; Benzo[a]pyrene-9,10-epoxide;; Benzo[a]pyrene-7,8-oxide; Benzo[a]pyrene-7,8-epoxide;;Benzo…	C07535+C19579+C14556+C14852+C14850+C14851+C14849+C14790+C14789
		map05204	Chemical carcinogenesis	8	Benzo[a]pyrene; Benzo[a]pyrene; Benzpyrene;; N-Hydroxy-MeIQx;;4-Hydroxy-4-(3-pyridyl)-butanoic acid; gamma-Hydroxy-3-pyridinebutanoate;; 9-Hydroxybenzo[a]pyrene;; Benzo[a]pyrene-7,8-diol; Benzo[a]pyrene-7,8-dihydrodiol;;Benzo[a]pyrene-7,8-oxide; Benzo[a]pyrene-4,5-oxide; Benzo[a]pyrene-4,5-epoxide;; Benzo[a]pyrene-9,10-oxide; Benzo[a]pyrene-9,10-epoxide;; Benzo[a]pyrene-7,8-oxide; Benzo[a]pyrene-…	C07535+C20291+C19579+C14556+C14852+C14850+C14851+C14849
		map00380	Tryptophan metabolism	7	N-Methyltryptamine; N-Methyltryptamine; N-Methylindoleethylamine; 1-Methyl-2-(3-indolyl)ethylamine;; 5-Hydroxyindoleacetate;;5-Hydroxyindoleacetic acid; 8-Methoxykynurenate; Xanthurenic acid 8-methyl ether;; 5-Hydroxyindolepyruvate;;8-Methoxykynurenate;Tryptophanol; Indole-3-ethanol; Tryptophol;;Formylanthranilic acid; Formylanthranilate; N-Formylanthranilate; 2-(Formylamino)-benzoic acid;; Indol…	C06213+C05635+C05830+C05646+C00955+C05653+C00637
		map00860	Porphyrin and chlorophyll metabolism	6	Geranylgeranyl bacteriochlorophyllide a;;Dimethylbenzimidazole; Dimethylbenzimidazole; 5,6-Dimethylbenzimidazole;; (3Z)-Phytochromobilin;; 12-Ethyl-8-propyl-3-vinylbacteriochlorophyllide d;; 15,16-Dihydrobiliverdin; 15,16-Dihydrobiliverdin IXalpha; 15,16-Dihydrobiliverdin ixa;;Bilirubin; Bilirubin;	C21217+C03114+C05913+C21428+C11630+C00486
		map04976	Bile secretion	6	Urate; Uric acid;;Uric acid;Valproic acid; Valproic acid;; Deoxycholic acid; Deoxycholate; 3alpha,12alpha-Dihydroxy-5beta-cholanate; 3alpha,12alpha-Dihydroxy-5beta-cholanic acid;; Chenodeoxycholate; Chenodeoxycholic acid; 3alpha,7alpha-Dihydroxy-5beta-cholanic acid; Chenodiol;;Chenodeoxycholic acid;Deoxycholic acid; Fexofenadine; 4-(1-Hydroxy-4-(4-(hydroxydiphenylmethyl)-1-piperidinyl)butyl)-alph…	C00366+C07185+C04483+C02528+C06999+C00486
		map01230	Biosynthesis of amino acids	5	L-Tyrosine; L-Tyrosine; (S)-3-(p-Hydroxyphenyl)alanine; (S)-2-Amino-3-(p-hydroxyphenyl)propionic acid; Tyrosine;; L-Arogenate; L-Arogenic acid; Pretyrosine;; (S)-3-Methyl-2-oxopentanoic acid; (S)-3-Methyl-2-oxopentanoate; (3S)-3-Methyl-2-oxopentanoic acid; (3S)-3-Methyl-2-oxopentanoate;;Ketoleucine; (R)-2,3-Dihydroxy-3-methylpentanoate; (R)-2,3-Dihydroxy-3-methylvalerate; (2R,3R)-2,3-Dihydroxy-3-…	C00082+C00826+C00671+C00233+C06007
		map00900	Terpenoid backbone biosynthesis	4	(2Z,6Z,10Z,14Z,18Z,22Z,26Z,30Z,34E)-Decaprenyl diphosphate;; all-trans-Decaprenyl diphosphate;; all-trans-Nonaprenyl diphosphate; Solanesyl pyrophosphate; Solanesyl diphosphate;;(R)-mevalonate; (R)-Mevalonate; Mevalonic acid; 3,5-Dihydroxy-3-methylvaleric acid;	C18321+C17432+C04145+C00418
		map00982	Drug metabolism - cytochrome P450	4	Carbamazepine iminoquinone; 2H-Dibenz[b,f]azepin-2-one;; 3-Carbamoyl-2-phenylpropionic acid;;3-Carbamoyl-2-phenylpropionic acid; 5-Phenyl-1,3-oxazinane-2,4-dione;;5-Phenyl-1,3-oxazinane-2,4-dione;Valproic acid; Valproic acid;	C16605+C16591+C16596+C07185
		map00350	Tyrosine metabolism	4	Succinate; Succinic acid; Butanedionic acid; Ethylenesuccinic acid;;Succinic acid; 3-Amino-3-(4-hydroxyphenyl)propanoate; beta-Tyrosine;;Beta-Tyrosine;L-Tyrosine; L-Tyrosine; (S)-3-(p-Hydroxyphenyl)alanine; (S)-2-Amino-3-(p-hydroxyphenyl)propionic acid; Tyrosine;;Hydroxyphenylacetylglycine; p-Hydroxyphenylacetylglycine; 4-Hydroxyphenylacetylglycine;	C00042+C04368+C00082+C05596
		map00360	Phenylalanine metabolism	3	Succinate; Succinic acid; Butanedionic acid; Ethylenesuccinic acid;;Succinic acid;L-Tyrosine; L-Tyrosine; (S)-3-(p-Hydroxyphenyl)alanine; (S)-2-Amino-3-(p-hydroxyphenyl)propionic acid; Tyrosine;;2-Phenylethanol; Phenylethyl alcohol; Phenethyl alcohol; 2-Phenylethanol;	C00042+C00082+C05853
		map00230	Purine metabolism	3	Urate; Uric acid;;Uric acid; Hypoxanthine; Purine-6-ol;;Hypoxanthine;Diadenosine tetraphosphate; P1,P4-Bis(5'-adenosyl)tetraphosphate; AppppA;	C00366+C00262+C01260
		map04216	Ferroptosis	3	PE(18:0/22:4(7Z,10Z,13Z,16Z)); 1-Octadecanoyl-2-(7Z,10Z,13Z,16Z-docosatetraenoyl)-sn-glycero-3-phosphoethanolamine;;(R)-mevalonate; (R)-Mevalonate; Mevalonic acid; 3,5-Dihydroxy-3-methylvaleric acid;; Erastin;	C21481+C00418+C21478
		map00750	Vitamin B6 metabolism	3	2-(Hydroxymethyl)-3-(acetamidomethylene)succinate; 2-(Acetamidomethylene)-3-(hydroxymethyl)succinate;; 4-Pyridoxolactone; 4-Pyridoxic acid lactone;;4-Pyridoxolactone; 5-Pyridoxolactone;;5-Pyridoxolactone	C04690+C00971+C06052
		map00130	Ubiquinone and other terpenoid-quinone biosynthesis	3	all-trans-Decaprenyl diphosphate;; all-trans-Nonaprenyl diphosphate; Solanesyl pyrophosphate; Solanesyl diphosphate;;L-Tyrosine; L-Tyrosine; (S)-3-(p-Hydroxyphenyl)alanine; (S)-2-Amino-3-(p-hydroxyphenyl)propionic acid; Tyrosine;	C17432+C04145+C00082
		map00280	Valine, leucine and isoleucine degradation	3	Methylmalonic acid; Methylmalonate; Methylmalonic acid;; (S)-3-Methyl-2-oxopentanoic acid; (S)-3-Methyl-2-oxopentanoate; (3S)-3-Methyl-2-oxopentanoic acid; (3S)-3-Methyl-2-oxopentanoate;;Ketoleucine; 4-Methyl-2-oxopentanoate; 2-Oxoisocaproate;	C02170+C00671+C00233
		map00140	Steroid hormone biosynthesis	3	17alpha,21-Dihydroxypregnenolone;; 3alpha,21-Dihydroxy-5beta-pregnane-11,20-dione; 5beta-Pregnane-3alpha,21-diol-11,20-dione;;17alpha,21-Dihydroxypregnenolone; 11beta,21-Dihydroxy-5beta-pregnane-3,20-dione; 5beta-Pregnane-11beta,21-diol-3,20-dione;	C05487+C05478+C05475
		map00440	Phosphonate and phosphinate metabolism	3	N-Trimethyl-2-aminoethylphosphonate; 2-Trimethylaminoethylphosphonate;; Rhizocticin C;; Rhizocticin D;	C06459+C17960+C17961
		map00290	Valine, leucine and isoleucine biosynthesis	3	(S)-3-Methyl-2-oxopentanoic acid; (S)-3-Methyl-2-oxopentanoate; (3S)-3-Methyl-2-oxopentanoic acid; (3S)-3-Methyl-2-oxopentanoate;;Ketoleucine; (R)-2,3-Dihydroxy-3-methylpentanoate; (R)-2,3-Dihydroxy-3-methylvalerate; (2R,3R)-2,3-Dihydroxy-3-methylpentanoate;;(R) 2,3-Dihydroxy-3-methylvalerate; 4-Methyl-2-oxopentanoate; 2-Oxoisocaproate;	C00671+C00233+C06007
		map00330	Arginine and proline metabolism	2	gamma-Glutamyl-gamma-aminobutyraldehyde;;S-Adenosylmethioninamine; S-Adenosylmethioninamine; (5-Deoxy-5-adenosyl)(3-aminopropyl)methylsulfonium; (5-Deoxy-5-adenosyl)(3-aminopropyl)methylsulfonium cation; S-Adenosyl-(5')-3-methylthiopropylamine; S-Adenosyl 3-(methylthio)propylamine; Decarboxy-AdoMet;	C15700+C01137
		map04080	Neuroactive ligand-receptor interaction	2	Sphinganine 1-phosphate; Dihydrosphingosine 1-phosphate;;Sphinganine 1-phosphate;Anandamide; Anandamide; Arachidonylethanolamide; N-(5Z,8Z,11Z,14Z-icosatetraenoyl)-ethanolamide; AEA;	C01120+C11695
		map00400	Phenylalanine, tyrosine and tryptophan biosynthesis	2	L-Tyrosine; L-Tyrosine; (S)-3-(p-Hydroxyphenyl)alanine; (S)-2-Amino-3-(p-hydroxyphenyl)propionic acid; Tyrosine;; L-Arogenate; L-Arogenic acid; Pretyrosine;	C00082+C00826
		map00730	Thiamine metabolism	2	Thiamin monophosphate; Thiamine monophosphate; Thiamin phosphate; Thiamine phosphate; TMP;;L-Tyrosine; L-Tyrosine; (S)-3-(p-Hydroxyphenyl)alanine; (S)-2-Amino-3-(p-hydroxyphenyl)propionic acid; Tyrosine;	C01081+C00082
		map00340	Histidine metabolism	2	Imidazole-4-acetate; Imidazoleacetic acid; 4-Imidazoleacetate;;Imidazoleacetic acid;Carglumic acid; N-Carbamyl-L-glutamate; Carglumic acid;	C02835+C05829
		map04974	Protein digestion and absorption	2	L-Tyrosine; L-Tyrosine; (S)-3-(p-Hydroxyphenyl)alanine; (S)-2-Amino-3-(p-hydroxyphenyl)propionic acid; Tyrosine;; 4-Cresol; p-Cresol; 4-Hydroxytoluene; 4-Methylphenol;;p-Cresol	C00082+C01468
		map00520	Amino sugar and nucleotide sugar metabolism	2	2,4-Diacetamido-2,4,6-trideoxy-D-mannopyranose; 2,4-Diacetamido-2,4,6-trideoxy-alpha-D-mannopyranose;; 2,4-Bis(acetamido)-2,4,6-trideoxy-beta-L-altropyranose;	C20424+C19972
		map00640	Propanoate metabolism	2	Succinate; Succinic acid; Butanedionic acid; Ethylenesuccinic acid;;Methylmalonic acid;Succinic acid; Methylmalonate; Methylmalonic acid;	C00042+C02170
		map00240	Pyrimidine metabolism	2	Methylmalonic acid; Methylmalonate; Methylmalonic acid;;Thymine; Thymine; 5-Methyluracil;	C02170+C00178
		map04742	Taste transduction	2	Saccharin; Saccharin sodium anhydrous;; Saccharin;	C12283+C12284
		map04750	Inflammatory mediator regulation of TRP channels	2	(5Z,7E,9E,14Z,17Z)-Eicosapentaenoic acid; (5Z,7E,9E,14Z,17Z)-Eicosapentaenoate;;Anandamide; Anandamide; Arachidonylethanolamide; N-(5Z,8Z,11Z,14Z-icosatetraenoyl)-ethanolamide; AEA;	C12083+C11695
		map05230	Central carbon metabolism in cancer	2	Succinate; Succinic acid; Butanedionic acid; Ethylenesuccinic acid;;Succinic acid;L-Tyrosine; L-Tyrosine; (S)-3-(p-Hydroxyphenyl)alanine; (S)-2-Amino-3-(p-hydroxyphenyl)propionic acid; Tyrosine;	C00042+C00082
		map00592	alpha-Linolenic acid metabolism	2	Methyl jasmonate; (+)-7-Isomethyljasmonate;; Methyl jasmonate; (-)-Methyl jasmonate;	C11512+C16318
		map04973	Carbohydrate digestion and absorption	1	Saccharin sodium anhydrous;	C12284
		map04024	cAMP signaling pathway	1	Succinate; Succinic acid; Butanedionic acid; Ethylenesuccinic acid;;Succinic acid	C00042
		map00061	Fatty acid biosynthesis	1	octanoate radical; Octanoic acid; Caprylic acid; Octylic acid;;Caprylic acid	C06423
		map00650	Butanoate metabolism	1	Succinate; Succinic acid; Butanedionic acid; Ethylenesuccinic acid;;Succinic acid	C00042
		map04917	Prolactin signaling pathway	1	L-Tyrosine; L-Tyrosine; (S)-3-(p-Hydroxyphenyl)alanine; (S)-2-Amino-3-(p-hydroxyphenyl)propionic acid; Tyrosine;	C00082
		map05034	Alcoholism	1	L-Tyrosine; L-Tyrosine; (S)-3-(p-Hydroxyphenyl)alanine; (S)-2-Amino-3-(p-hydroxyphenyl)propionic acid; Tyrosine;	C00082
		map00120	Primary bile acid biosynthesis	1	Chenodeoxycholate; Chenodeoxycholic acid; 3alpha,7alpha-Dihydroxy-5beta-cholanic acid; Chenodiol;;Chenodeoxycholic acid	C02528
		map04728	Dopaminergic synapse	1	L-Tyrosine; L-Tyrosine; (S)-3-(p-Hydroxyphenyl)alanine; (S)-2-Amino-3-(p-hydroxyphenyl)propionic acid; Tyrosine;	C00082
		map00770	Pantothenate and CoA biosynthesis	1	(R)-Pantoate; Pantoate; Pantoic acid;	C00522
		map00020	Citrate cycle (TCA cycle)	1	Succinate; Succinic acid; Butanedionic acid; Ethylenesuccinic acid;;Succinic acid	C00042
		map04916	Melanogenesis	1	L-Tyrosine; L-Tyrosine; (S)-3-(p-Hydroxyphenyl)alanine; (S)-2-Amino-3-(p-hydroxyphenyl)propionic acid; Tyrosine;	C00082
		map00564	Glycerophospholipid metabolism	1	2,3-Bis-O-(geranylgeranyl)-sn-glycero-1-phospho-L-serine;	C20466
		map00620	Pyruvate metabolism	1	Succinate; Succinic acid; Butanedionic acid; Ethylenesuccinic acid;;Succinic acid	C00042
		map00524	Neomycin, kanamycin and gentamicin biosynthesis	1	6'-Dehydro-6'-oxoparomamine; 6'-Dehydroparomamine; 6'-Oxoparomamine;	C17583
		map00250	Alanine, aspartate and glutamate metabolism	1	Succinate; Succinic acid; Butanedionic acid; Ethylenesuccinic acid;;Succinic acid	C00042
		map00190	Oxidative phosphorylation	1	Succinate; Succinic acid; Butanedionic acid; Ethylenesuccinic acid;;Succinic acid	C00042
		map04726	Serotonergic synapse	1	5-Hydroxyindoleacetate;;5-Hydroxyindoleacetic acid	C05635
		map04727	GABAergic synapse	1	Succinate; Succinic acid; Butanedionic acid; Ethylenesuccinic acid;;Succinic acid	C00042
		map00970	Aminoacyl-tRNA biosynthesis	1	L-Tyrosine; L-Tyrosine; (S)-3-(p-Hydroxyphenyl)alanine; (S)-2-Amino-3-(p-hydroxyphenyl)propionic acid; Tyrosine;	C00082
		map00740	Riboflavin metabolism	1	Dimethylbenzimidazole; Dimethylbenzimidazole; 5,6-Dimethylbenzimidazole;	C03114
		map05012	Parkinson's disease	1	L-Tyrosine; L-Tyrosine; (S)-3-(p-Hydroxyphenyl)alanine; (S)-2-Amino-3-(p-hydroxyphenyl)propionic acid; Tyrosine;	C00082
		map00920	Sulfur metabolism	1	Succinate; Succinic acid; Butanedionic acid; Ethylenesuccinic acid;;Succinic acid	C00042
		map00760	Nicotinate and nicotinamide metabolism	1	Succinate; Succinic acid; Butanedionic acid; Ethylenesuccinic acid;;Succinic acid	C00042
		map04922	Glucagon signaling pathway	1	Succinate; Succinic acid; Butanedionic acid; Ethylenesuccinic acid;;Succinic acid	C00042
		map05031	Amphetamine addiction	1	L-Tyrosine; L-Tyrosine; (S)-3-(p-Hydroxyphenyl)alanine; (S)-2-Amino-3-(p-hydroxyphenyl)propionic acid; Tyrosine;	C00082
		map00600	Sphingolipid metabolism	1	Sphinganine 1-phosphate; Dihydrosphingosine 1-phosphate;;Sphinganine 1-phosphate	C01120
		map00270	Cysteine and methionine metabolism	1	S-Adenosylmethioninamine; S-Adenosylmethioninamine; (5-Deoxy-5-adenosyl)(3-aminopropyl)methylsulfonium; (5-Deoxy-5-adenosyl)(3-aminopropyl)methylsulfonium cation; S-Adenosyl-(5')-3-methylthiopropylamine; S-Adenosyl 3-(methylthio)propylamine; Decarboxy-AdoMet;	C01137
		map00630	Glyoxylate and dicarboxylate metabolism	1	Succinate; Succinic acid; Butanedionic acid; Ethylenesuccinic acid;;Succinic acid	C00042
		map01200	Carbon metabolism	1	Succinate; Succinic acid; Butanedionic acid; Ethylenesuccinic acid;;Succinic acid	C00042
		map05030	Cocaine addiction	1	L-Tyrosine; L-Tyrosine; (S)-3-(p-Hydroxyphenyl)alanine; (S)-2-Amino-3-(p-hydroxyphenyl)propionic acid; Tyrosine;	C00082
		map04723	Retrograde endocannabinoid signaling	1	Anandamide; Anandamide; Arachidonylethanolamide; N-(5Z,8Z,11Z,14Z-icosatetraenoyl)-ethanolamide; AEA;	C11695
		map01040	Biosynthesis of unsaturated fatty acids	1	Eicosapentaenoic acid; (5Z,8Z,11Z,14Z,17Z)-Icosapentaenoic acid; (5Z,8Z,11Z,14Z,17Z)-Eicosapentaenoic acid; Eicosapentaenoic acid; 5,8,11,14,17-Icosapentaenoic acid; (5Z,8Z,11Z,14Z,17Z)-Eicosapentaenoate;	C06428
		map00053	Ascorbate and aldarate metabolism	1	Threonate; L-Threonate; (2R,3S)-2,3,4-Trihydroxybutanoic acid;;L-threonic Acid	C01620
ESI−	12 hpi	map01100	Metabolic pathways	18	cis-Aconitate; cis-Aconitic acid;; Dehydroascorbate; Dehydroascorbic acid; L-Dehydroascorbate; L-Dehydroascorbic acid;;cis-Aconitic acid;Ascorbic acid; D-Glucuronolactone; Glucurone; D-Glucurono-3,6-lactone; D-Glucurone;; Ascorbate; Ascorbic acid; L-Ascorbate; L-Ascorbic acid; Vitamin C;; Monodehydroascorbate; Monodehydroascorbate radical; Ascorbate radical; Semidehydroascorbic acid;; L-xylo-Hexu…	C00417+C05422+C00072+C02670+C01041+C03289+C04281+C06022+C11874+C06087+C01312+C00696+C00584+C02198+C00427+C15794+C15803+C03242
		map00590	Arachidonic acid metabolism	10	2,3-Dinor-8-iso prostaglandin F1alpha; 2,3-Dinor-8-iso PGF1alpha;;Prostaglandin I2; Prostaglandin D2; (5Z,13E)-(15S)-9alpha,15-Dihydroxy-11-oxoprosta-5,13-dienoate; (5Z,13E,15S)-9alpha,15-Dihydroxy-11-oxoprosta-5,13-dienoate; PGD2;;Lipoxin B4; Prostaglandin E2; (5Z,13E)-(15S)-11alpha,15-Dihydroxy-9-oxoprosta-5,13-dienoate; (5Z,13E)-(15S)-11alpha,15-Dihydroxy-9-oxoprost-13-enoate; Dinoprostone; PG…	C14795+C01312+C00696+C06315+C00584+C04853+C02198+C06314+C05960+C00427
		map01040	Biosynthesis of unsaturated fatty acids	6	(5Z,8Z,11Z,14Z,17Z)-Icosapentaenoic acid; (5Z,8Z,11Z,14Z,17Z)-Eicosapentaenoic acid; Eicosapentaenoic acid; 5,8,11,14,17-Icosapentaenoic acid; (5Z,8Z,11Z,14Z,17Z)-Eicosapentaenoate;;Eicosapentaenoic acid;Docosahexaenoic acid; (4Z,7Z,10Z,13Z,16Z,19Z)-Docosahexaenoic acid; 4,7,10,13,16,19-Docosahexaenoic acid; Docosahexaenoic acid; Docosahexaenoate;; (7Z,10Z,13Z,16Z,19Z)-Docosa-7,10,13,16,19-pentae…	C06428+C06429+C16513+C16522+C03242+C16525
		map04080	Neuroactive ligand-receptor interaction	5	Prostaglandin I2; Prostaglandin D2; (5Z,13E)-(15S)-9alpha,15-Dihydroxy-11-oxoprosta-5,13-dienoate; (5Z,13E,15S)-9alpha,15-Dihydroxy-11-oxoprosta-5,13-dienoate; PGD2;; Prostaglandin E2; (5Z,13E)-(15S)-11alpha,15-Dihydroxy-9-oxoprosta-5,13-dienoate; (5Z,13E)-(15S)-11alpha,15-Dihydroxy-9-oxoprost-13-enoate; Dinoprostone; PGE2;;Thromboxane A2;Prostaglandin E2; Lipoxin A4; LXA4; 5S,6R,15S-Trihydroxy-7…	C01312+C00696+C00584+C02198+C06314
		map00053	Ascorbate and aldarate metabolism	5	Dehydroascorbate; Dehydroascorbic acid; L-Dehydroascorbate; L-Dehydroascorbic acid;;Ascorbic acid; D-Glucuronolactone; Glucurone; D-Glucurono-3,6-lactone; D-Glucurone;; Ascorbate; Ascorbic acid; L-Ascorbate; L-Ascorbic acid; Vitamin C;; Monodehydroascorbate; Monodehydroascorbate radical; Ascorbate radical; Semidehydroascorbic acid;; L-xylo-Hexulonolactone; L-xylo-Hex-2-ulono-1,4-lactone;	C05422+C00072+C02670+C01041+C03289
		map04726	Serotonergic synapse	4	Prostaglandin D2; (5Z,13E)-(15S)-9alpha,15-Dihydroxy-11-oxoprosta-5,13-dienoate; (5Z,13E,15S)-9alpha,15-Dihydroxy-11-oxoprosta-5,13-dienoate; PGD2;; Prostaglandin E2; (5Z,13E)-(15S)-11alpha,15-Dihydroxy-9-oxoprosta-5,13-dienoate; (5Z,13E)-(15S)-11alpha,15-Dihydroxy-9-oxoprost-13-enoate; Dinoprostone; PGE2;;Thromboxane A2;Prostaglandin E2;Prostaglandin D2; Thromboxane A2; (5Z,13E)-(15S)-9alpha,11a…	C00696+C00584+C02198+C00427
		map04611	Platelet activation	3	Prostaglandin I2;Thromboxane A2; Thromboxane A2; (5Z,13E)-(15S)-9alpha,11alpha-Epoxy-15-hydroxythromboxa-5,13-dienoate; (5Z,9alpha,11alpha,13E,15S)-9,11-Epoxy-15-hydroxythromboxa-5,13-dien-1-oic acid; TXA2;; Prostaglandin H2; (5Z,13E)-(15S)-9alpha,11alpha-Epidioxy-15-hydroxyprosta-5,13-dienoate; (5Z,13E,15S)-9alpha,11alpha-Epidioxy-15-hydroxyprosta-5,13-dienoate; PGH2; (5Z,9alpha,11alpha,13E,15S)…	C01312+C02198+C00427
		map00480	Glutathione metabolism	3	Dehydroascorbate; Dehydroascorbic acid; L-Dehydroascorbate; L-Dehydroascorbic acid;;Ascorbic acid; Ascorbate; Ascorbic acid; L-Ascorbate; L-Ascorbic acid; Vitamin C;; 5-Oxoproline; Pidolic acid; Pyroglutamic acid; 5-Pyrrolidone-2-carboxylic acid; Pyroglutamate; 5-Oxo-L-proline; L-Pyroglutamic acid; L-5-Pyrrolidone-2-carboxylic acid;;Pyroglutamic acid	C05422+C00072+C01879
		map00330	Arginine and proline metabolism	3	1-Pyrroline-4-hydroxy-2-carboxylate;;(3R,5S)-1-pyrroline-3-hydroxy-5-carboxylic Acid; 4-Oxoproline; 4-Oxo-L-proline;; L-1-Pyrroline-3-hydroxy-5-carboxylate; 3-Hydroxy-L-1-pyrroline-5-carboxylate; (3R,5S)-1-Pyrroline-3-hydroxy-5-carboxylate; (3R,5S)-3-Hydroxy-1-pyrroline-5-carboxylate;;1-Pyrroline-4-hydroxy-2-carboxylate	C04282+C04281+C01877
		map00040	Pentose and glucuronate interconversions	2	(4S)-4,6-Dihydroxy-2,5-dioxohexanoate; 3-Deoxy-D-glycero-2,5-hexodiulosonate; 2,5-Diketo-3-deoxy-D-gluconate;; 5-Dehydro-4-deoxy-D-glucuronate; 4-Deoxy-L-threo-5-hexosulose uronate;	C04349+C04053
		map04921	Oxytocin signaling pathway	2	Prostaglandin E2; (5Z,13E)-(15S)-11alpha,15-Dihydroxy-9-oxoprosta-5,13-dienoate; (5Z,13E)-(15S)-11alpha,15-Dihydroxy-9-oxoprost-13-enoate; Dinoprostone; PGE2;;Prostaglandin E2; Prostaglandin H2; (5Z,13E)-(15S)-9alpha,11alpha-Epidioxy-15-hydroxyprosta-5,13-dienoate; (5Z,13E,15S)-9alpha,11alpha-Epidioxy-15-hydroxyprosta-5,13-dienoate; PGH2; (5Z,9alpha,11alpha,13E,15S)-9,11-Epidioxy-15-hydroxy-prost…	C00584+C00427
		map05200	Pathways in cancer	2	4-Hydroxynonenal; 4-Hydroxynonenal; 4-hydroxy-2-nonenal; 4-HNE;; Prostaglandin E2; (5Z,13E)-(15S)-11alpha,15-Dihydroxy-9-oxoprosta-5,13-dienoate; (5Z,13E)-(15S)-11alpha,15-Dihydroxy-9-oxoprost-13-enoate; Dinoprostone; PGE2;;Prostaglandin E2	C21642+C00584
		map05143	African trypanosomiasis	2	Prostaglandin D2; (5Z,13E)-(15S)-9alpha,15-Dihydroxy-11-oxoprosta-5,13-dienoate; (5Z,13E,15S)-9alpha,15-Dihydroxy-11-oxoprosta-5,13-dienoate; PGD2;; Prostaglandin E2; (5Z,13E)-(15S)-11alpha,15-Dihydroxy-9-oxoprosta-5,13-dienoate; (5Z,13E)-(15S)-11alpha,15-Dihydroxy-9-oxoprost-13-enoate; Dinoprostone; PGE2;;Prostaglandin E2;Prostaglandin D2	C00696+C00584
		map04750	Inflammatory mediator regulation of TRP channels	2	(5Z,7E,9E,14Z,17Z)-Eicosapentaenoic acid; (5Z,7E,9E,14Z,17Z)-Eicosapentaenoate;; Prostaglandin E2; (5Z,13E)-(15S)-11alpha,15-Dihydroxy-9-oxoprosta-5,13-dienoate; (5Z,13E)-(15S)-11alpha,15-Dihydroxy-9-oxoprost-13-enoate; Dinoprostone; PGE2;;Prostaglandin E2	C12083+C00584
		map04976	Bile secretion	2	Taurochenodeoxycholate; Taurochenodeoxycholic acid; Chenodeoxycholoyltaurine;;Taurochenodesoxycholic acid; Prostaglandin E2; (5Z,13E)-(15S)-11alpha,15-Dihydroxy-9-oxoprosta-5,13-dienoate; (5Z,13E)-(15S)-11alpha,15-Dihydroxy-9-oxoprost-13-enoate; Dinoprostone; PGE2;;Prostaglandin E2	C05465+C00584
		map04024	cAMP signaling pathway	2	Prostaglandin I2; Prostaglandin E2; (5Z,13E)-(15S)-11alpha,15-Dihydroxy-9-oxoprosta-5,13-dienoate; (5Z,13E)-(15S)-11alpha,15-Dihydroxy-9-oxoprost-13-enoate; Dinoprostone; PGE2;;Prostaglandin E2; Prostaglandin I2; (5Z,13E)-(15S)-6,9alpha-Epoxy-11alpha,15-dihydroxyprosta-5,13-dienoate; Prostacyclin; PGI2; Epoprostenol;	C01312+C00584
		map00630	Glyoxylate and dicarboxylate metabolism	2	cis-Aconitate; cis-Aconitic acid;;cis-Aconitic acid; 2-Hydroxy-3-oxoadipate;	C00417+C03217
		map04923	Regulation of lipolysis in adipocytes	1	Prostaglandin E2; (5Z,13E)-(15S)-11alpha,15-Dihydroxy-9-oxoprosta-5,13-dienoate; (5Z,13E)-(15S)-11alpha,15-Dihydroxy-9-oxoprost-13-enoate; Dinoprostone; PGE2;;Prostaglandin E2	C00584
		map04924	Renin secretion	1	Prostaglandin E2; (5Z,13E)-(15S)-11alpha,15-Dihydroxy-9-oxoprosta-5,13-dienoate; (5Z,13E)-(15S)-11alpha,15-Dihydroxy-9-oxoprost-13-enoate; Dinoprostone; PGE2;;Prostaglandin E2	C00584
		map00562	Inositol phosphate metabolism	1	3-Dehydro-scyllo-inosose; 2,4-Didehydroinositol;	C21643
		map05165	Human papillomavirus infection	1	Prostaglandin E2; (5Z,13E)-(15S)-11alpha,15-Dihydroxy-9-oxoprosta-5,13-dienoate; (5Z,13E)-(15S)-11alpha,15-Dihydroxy-9-oxoprost-13-enoate; Dinoprostone; PGE2;;Prostaglandin E2	C00584
		map00310	Lysine degradation	1	D-Lysopine; N2-(D-1-Carboxyethyl)-L-lysine; Lysopine;	C04020
		map05310	Asthma	1	Prostaglandin D2; (5Z,13E)-(15S)-9alpha,15-Dihydroxy-11-oxoprosta-5,13-dienoate; (5Z,13E,15S)-9alpha,15-Dihydroxy-11-oxoprosta-5,13-dienoate; PGD2;;Prostaglandin D2	C00696
		map00020	Citrate cycle (TCA cycle)	1	cis-Aconitate; cis-Aconitic acid;;cis-Aconitic acid	C00417
		map04066	HIF-1 signaling pathway	1	Ascorbic acid; Ascorbate; Ascorbic acid; L-Ascorbate; L-Ascorbic acid; Vitamin C;	C00072
		map00591	Linoleic acid metabolism	1	(8Z,11Z,14Z)-Icosatrienoic acid; Dihomo-gamma-linolenic acid; (Z,Z,Z)-8,11,14-Eicosatrienoic acid; (Z,Z,Z)-8,11,14-Icosatrienoic acid; (Z,Z,Z)-8,11,14-Eicosatrienoate; (Z,Z,Z)-8,11,14-Icosatrienoate; 8,11,14-Eicosatrienoate; 8,11,14-Icosatrienoate;;8,11,14-Eicosatrienoic acid	C03242
		map04723	Retrograde endocannabinoid signaling	1	Prostaglandin H2; (5Z,13E)-(15S)-9alpha,11alpha-Epidioxy-15-hydroxyprosta-5,13-dienoate; (5Z,13E,15S)-9alpha,11alpha-Epidioxy-15-hydroxyprosta-5,13-dienoate; PGH2; (5Z,9alpha,11alpha,13E,15S)-9,11-Epidioxy-15-hydroxy-prosta-5,13-dienoate;;Prostaglandin H2	C00427
		map05140	Leishmaniasis	1	Prostaglandin E2; (5Z,13E)-(15S)-11alpha,15-Dihydroxy-9-oxoprosta-5,13-dienoate; (5Z,13E)-(15S)-11alpha,15-Dihydroxy-9-oxoprost-13-enoate; Dinoprostone; PGE2;;Prostaglandin E2	C00584
		map00471	D-Glutamine and D-glutamate metabolism	1	5-Oxo-D-proline; D-Pyroglutamic acid; D-5-Pyrrolidone-2-carboxylic acid;	C02237
		map05225	Hepatocellular carcinoma	1	4-Hydroxynonenal; 4-Hydroxynonenal; 4-hydroxy-2-nonenal; 4-HNE;	C21642
		map01210	2-Oxocarboxylic acid metabolism	1	cis-Aconitate; cis-Aconitic acid;;cis-Aconitic acid	C00417
		map00524	Neomycin, kanamycin and gentamicin biosynthesis	1	6'-Oxogentamicin X2;	C21267
		map05145	Toxoplasmosis	1	Lipoxin A4; LXA4; 5S,6R,15S-Trihydroxy-7E,9E,11Z,13E-eicosatetraenoic acid; (7E,9E,11Z,13E)-(5S,6R,15S)-5,6,15-Trihydroxyicosa-7,9,11,13-tetraenoic acid;;Lipoxin A4	C06314
		map04664	Fc epsilon RI signaling pathway	1	Prostaglandin D2; (5Z,13E)-(15S)-9alpha,15-Dihydroxy-11-oxoprosta-5,13-dienoate; (5Z,13E,15S)-9alpha,15-Dihydroxy-11-oxoprosta-5,13-dienoate; PGD2;;Prostaglandin D2	C00696
		map00564	Glycerophospholipid metabolism	1	3-(O-Geranylgeranyl)-sn-glycerol 1-phosphate;	C04590
		map04270	Vascular smooth muscle contraction	1	Prostaglandin I2; Prostaglandin I2; (5Z,13E)-(15S)-6,9alpha-Epoxy-11alpha,15-dihydroxyprosta-5,13-dienoate; Prostacyclin; PGI2; Epoprostenol;	C01312
		map05323	Rheumatoid arthritis	1	Prostaglandin E2; (5Z,13E)-(15S)-11alpha,15-Dihydroxy-9-oxoprosta-5,13-dienoate; (5Z,13E)-(15S)-11alpha,15-Dihydroxy-9-oxoprost-13-enoate; Dinoprostone; PGE2;;Prostaglandin E2	C00584
		map04979	Cholesterol metabolism	1	Taurochenodeoxycholate; Taurochenodeoxycholic acid; Chenodeoxycholoyltaurine;;Taurochenodesoxycholic acid	C05465
		map04977	Vitamin digestion and absorption	1	Ascorbic acid; Ascorbate; Ascorbic acid; L-Ascorbate; L-Ascorbic acid; Vitamin C;	C00072
		map05146	Amoebiasis	1	Prostaglandin E2; (5Z,13E)-(15S)-11alpha,15-Dihydroxy-9-oxoprosta-5,13-dienoate; (5Z,13E)-(15S)-11alpha,15-Dihydroxy-9-oxoprost-13-enoate; Dinoprostone; PGE2;;Prostaglandin E2	C00584
		map00120	Primary bile acid biosynthesis	1	Taurochenodeoxycholate; Taurochenodeoxycholic acid; Chenodeoxycholoyltaurine;;Taurochenodesoxycholic acid	C05465
		map04370	VEGF signaling pathway	1	Prostaglandin I2; Prostaglandin I2; (5Z,13E)-(15S)-6,9alpha-Epoxy-11alpha,15-dihydroxyprosta-5,13-dienoate; Prostacyclin; PGI2; Epoprostenol;	C01312
	24 hpi	map01100	Metabolic pathways	27	D-Fructose 6-phosphate; D-Fructose 6-phosphoric acid; Neuberg ester;; alpha-D-Galactose 1-phosphate; alpha-D-Galactopyranose 1-phosphate;;Glucose 6-phosphate; D-Glucose 1-phosphate; alpha-D-Glucose 1-phosphate; Cori ester; D-Glucose alpha-1-phosphate;;D-Myo-inositol 4-phosphate; beta-D-Glucose 6-phosphate;;D-Tagatose 6-phosphate; D-arabino-Hex-3-ulose 6-phosphate; D-arabino-3-Hexulose 6-phosphate…	C00085+C00446+C00092+C00103+C03546+C01172+C01097+C06019+C05345+C04006+C00636+C15926+C01094+C00275+C01113+C00668+C00262+C05961+C05963+C02165+C05356+C14823+C14813+C14781+C05966+C14812+C05965
		map00590	Arachidonic acid metabolism	15	6-Keto-prostaglandin F1a; 6-Keto-prostaglandin F1alpha; 6-Keto-prostaglandin F1a; 6-Keto-PGF1alpha; 6-Keto-PGF1a;; Thromboxane B2; TXB2;; Leukotriene B4; (6Z,8E,10E,14Z)-(5S,12R)-5,12-Dihydroxyeicosa-6,8,10,14-tetraenoate; (6Z,8E,10E,14Z)-(5S,12R)-5,12-Dihydroxyicosa-6,8,10,14-tetraenoate; LTB4;; 9(S)-HPETE; (5Z,7E,11Z,14Z)-(9S)-9-Hydroperoxyeicosa-5,7,11,14-tetraenoic acid; (5Z,7E,11Z,14Z)-(9S)-…	C05961+C05963+C02165+C14821+C05356+C14823+C14808+C14813+C14820+C14781+C04822+C05966+C14812+C05965+C14810
		map04726	Serotonergic synapse	10	Thromboxane B2; TXB2;; Leukotriene B4; (6Z,8E,10E,14Z)-(5S,12R)-5,12-Dihydroxyeicosa-6,8,10,14-tetraenoate; (6Z,8E,10E,14Z)-(5S,12R)-5,12-Dihydroxyicosa-6,8,10,14-tetraenoate; LTB4;; 9(S)-HPETE; (5Z,7E,11Z,14Z)-(9S)-9-Hydroperoxyeicosa-5,7,11,14-tetraenoic acid; (5Z,7E,11Z,14Z)-(9S)-9-Hydroperoxyicosa-5,7,11,14-tetraenoic acid;; 5(S)-HPETE; 5(S)-Hydroperoxy-6-trans-8,11,14-cis-eicosatetraenoic ac…	C05963+C02165+C14821+C05356+C14823+C14820+C04822+C05966+C14812+C05965
		map00051	Fructose and mannose metabolism	8	D-Allulose 6-phosphate;; D-Allose 6-phosphate;; Sorbose 1-phosphate; L-Sorbose 1P; L-xylo-Hexulose 1-phosphate; L-Sorbose 1-phosphate;; beta-D-Fructose 2-phosphate; beta-D-Fructofuranose 2-phosphate;; beta-D-Fructose 6-phosphate;;Beta-D-Fructose 2-phosphate;Beta-D-Fructose 6-phosphate;Sorbose 1-phosphate; D-Mannose 1-phosphate; alpha-D-Mannose 1-phosphate;; D-Fructose 1-phosphate;; D-Mannose 6-ph…	C18096+C02962+C02888+C03267+C05345+C00636+C01094+C00275
		map00520	Amino sugar and nucleotide sugar metabolism	6	alpha-D-Galactose 1-phosphate; alpha-D-Galactopyranose 1-phosphate;; D-Glucose 1-phosphate; alpha-D-Glucose 1-phosphate; Cori ester; D-Glucose alpha-1-phosphate;; beta-D-Fructose 6-phosphate;;Beta-D-Fructose 6-phosphate; D-Mannose 1-phosphate; alpha-D-Mannose 1-phosphate;; D-Mannose 6-phosphate;; alpha-D-Glucose 6-phosphate;;Galactose 1-phosphate	C00446+C00103+C05345+C00636+C00275+C00668
		map00052	Galactose metabolism	6	D-Fructose 6-phosphate; D-Fructose 6-phosphoric acid; Neuberg ester;; alpha-D-Galactose 1-phosphate; alpha-D-Galactopyranose 1-phosphate;; D-Glucose 1-phosphate; alpha-D-Glucose 1-phosphate; Cori ester; D-Glucose alpha-1-phosphate;;D-Tagatose 6-phosphate; D-Tagatose 6-phosphate;; D-Galactose 6-phosphate; 6-Phospho-D-galactose;; alpha-D-Glucose 6-phosphate;;Galactose 1-phosphate	C00085+C00446+C00103+C01097+C01113+C00668
		map01200	Carbon metabolism	5	D-Fructose 6-phosphate; D-Fructose 6-phosphoric acid; Neuberg ester;; beta-D-Glucose 6-phosphate;; D-arabino-Hex-3-ulose 6-phosphate; D-arabino-3-Hexulose 6-phosphate; D-arabino-6-Phospho-hex-3-ulose;; beta-D-Fructose 6-phosphate;;Beta-D-Fructose 6-phosphate; alpha-D-Glucose 6-phosphate;;Beta-D-Glucose 6-phosphate	C00085+C01172+C06019+C05345+C00668
		map00500	Starch and sucrose metabolism	4	D-Fructose 6-phosphate; D-Fructose 6-phosphoric acid; Neuberg ester;;Glucose 6-phosphate; D-Glucose 1-phosphate; alpha-D-Glucose 1-phosphate; Cori ester; D-Glucose alpha-1-phosphate;; beta-D-Glucose 1-phosphate;; D-Glucose 6-phosphate; Glucose 6-phosphate; Robison ester;	C00085+C00092+C00103+C00663
		map04976	Bile secretion	4	Thromboxane B2; TXB2;; Levofloxacin; Ofloxacin S-(-)-form;;Levofloxacin; Leukotriene B4; (6Z,8E,10E,14Z)-(5S,12R)-5,12-Dihydroxyeicosa-6,8,10,14-tetraenoate; (6Z,8E,10E,14Z)-(5S,12R)-5,12-Dihydroxyicosa-6,8,10,14-tetraenoate; LTB4;;Leukotriene B4; Pravastatin;;Pravastatin	C05963+C07660+C02165+C01844
		map00030	Pentose phosphate pathway	4	beta-D-Glucose 6-phosphate;; D-arabino-Hex-3-ulose 6-phosphate; D-arabino-3-Hexulose 6-phosphate; D-arabino-6-Phospho-hex-3-ulose;; beta-D-Fructose 6-phosphate;;Beta-D-Fructose 6-phosphate; alpha-D-Glucose 6-phosphate;;Beta-D-Glucose 6-phosphate	C01172+C06019+C05345+C00668
		map04922	Glucagon signaling pathway	4	D-Fructose 6-phosphate; D-Fructose 6-phosphoric acid; Neuberg ester;; D-Glucose 1-phosphate; alpha-D-Glucose 1-phosphate; Cori ester; D-Glucose alpha-1-phosphate;; beta-D-Glucose 6-phosphate;; alpha-D-Glucose 6-phosphate;;Beta-D-Glucose 6-phosphate	C00085+C00103+C01172+C00668
		map00562	Inositol phosphate metabolism	4	Glucose 6-phosphate; Inositol 1-phosphate; myo-Inositol 1-phosphate; 1D-myo-Inositol 1-phosphate; D-myo-Inositol 1-phosphate; 1D-myo-Inositol 1-monophosphate;;D-Myo-inositol 4-phosphate; myo-Inositol 4-phosphate; D-myo-Inositol 4-phosphate; 1D-myo-Inositol 4-phosphate; 1D-myo-Inositol 4-monophosphate; Inositol 4-phosphate;; D-Glucose 6-phosphate; Glucose 6-phosphate; Robison ester;; 1D-myo-Inosit…	C00092+C01177+C03546+C04006
		map00010	Glycolysis / Gluconeogenesis	4	D-Glucose 1-phosphate; alpha-D-Glucose 1-phosphate; Cori ester; D-Glucose alpha-1-phosphate;; beta-D-Glucose 6-phosphate;; beta-D-Fructose 6-phosphate;;Beta-D-Fructose 6-phosphate; alpha-D-Glucose 6-phosphate;;Beta-D-Glucose 6-phosphate	C00103+C01172+C05345+C00668
		map00053	Ascorbate and aldarate metabolism	3	L-Gulose 1-phosphate;; beta-L-Galactose 1-phosphate; L-Galactose 1-phosphate;;L-threonic Acid; Threonate; L-Threonate; (2R,3S)-2,3,4-Trihydroxybutanoic acid;	C15924+C15926+C01620
		map04070	Phosphatidylinositol signaling system	3	Inositol 1-phosphate; myo-Inositol 1-phosphate; 1D-myo-Inositol 1-phosphate; D-myo-Inositol 1-phosphate; 1D-myo-Inositol 1-monophosphate;;D-Myo-inositol 4-phosphate; myo-Inositol 4-phosphate; D-myo-Inositol 4-phosphate; 1D-myo-Inositol 4-phosphate; 1D-myo-Inositol 4-monophosphate; Inositol 4-phosphate;; 1D-myo-Inositol 3-phosphate; D-myo-Inositol 3-phosphate; myo-Inositol 3-phosphate; Inositol 3-…	C01177+C03546+C04006
		map04750	Inflammatory mediator regulation of TRP channels	3	Leukotriene B4; (6Z,8E,10E,14Z)-(5S,12R)-5,12-Dihydroxyeicosa-6,8,10,14-tetraenoate; (6Z,8E,10E,14Z)-(5S,12R)-5,12-Dihydroxyicosa-6,8,10,14-tetraenoate; LTB4;; 15(S)-HPETE; (5Z,8Z,11Z,13E)-(15S)-15-Hydroperoxyicosa-5,8,11,13-tetraenoic acid; 15-Hydroperoxyeicosatetraenoate; 15-Hydroperoxyicosatetraenoate; 15-Hydroperoxyeicosatetraenoic acid; 15-Hydroperoxyicosatetraenoic acid; (5Z,8Z,11Z,13E)-(15…	C02165+C05966+C05965
		map04152	AMPK signaling pathway	3	D-Fructose 6-phosphate; D-Fructose 6-phosphoric acid; Neuberg ester;; beta-D-Glucose 6-phosphate;; alpha-D-Glucose 6-phosphate;;Beta-D-Glucose 6-phosphate	C00085+C01172+C00668
		map04080	Neuroactive ligand-receptor interaction	2	Leukotriene B4; (6Z,8E,10E,14Z)-(5S,12R)-5,12-Dihydroxyeicosa-6,8,10,14-tetraenoate; (6Z,8E,10E,14Z)-(5S,12R)-5,12-Dihydroxyicosa-6,8,10,14-tetraenoate; LTB4;;Leukotriene B4;Thyrotropin releasing hormone; Thyrotropin-releasing hormone; TRH; Protirelin; Thyroliberin;	C02165+C03958
		map05230	Central carbon metabolism in cancer	2	D-Fructose 6-phosphate; D-Fructose 6-phosphoric acid; Neuberg ester;;Glucose 6-phosphate; D-Glucose 6-phosphate; Glucose 6-phosphate; Robison ester;	C00085+C00092
		map01230	Biosynthesis of amino acids	2	D-arabino-Hex-3-ulose 6-phosphate; D-arabino-3-Hexulose 6-phosphate; D-arabino-6-Phospho-hex-3-ulose;; beta-D-Fructose 6-phosphate;;Beta-D-Fructose 6-phosphate	C06019+C05345
		map04913	Ovarian steroidogenesis	2	5(S)-HPETE; 5(S)-Hydroperoxy-6-trans-8,11,14-cis-eicosatetraenoic acid; (6E,8Z,11Z,14Z)-(5S)-5-Hydroperoxyeicosa-6,8,11,14-tetraenoate; (6E,8Z,11Z,14Z)-(5S)-5-Hydroperoxyeicosa-6,8,11,14-tetraenoic acid; (5S,6E,8Z,11Z,14Z)-5-Hydroperoxyicosa-6,8,11,14-tetraenoate;; 15(S)-HPETE; (5Z,8Z,11Z,13E)-(15S)-15-Hydroperoxyicosa-5,8,11,13-tetraenoic acid; 15-Hydroperoxyeicosatetraenoate; 15-Hydroperoxyicos…	C05356+C05966
		map04931	Insulin resistance	2	D-Fructose 6-phosphate; D-Fructose 6-phosphoric acid; Neuberg ester;;Glucose 6-phosphate; D-Glucose 6-phosphate; Glucose 6-phosphate; Robison ester;	C00085+C00092
		map03320	PPAR signaling pathway	1	Leukotriene B4; (6Z,8E,10E,14Z)-(5S,12R)-5,12-Dihydroxyeicosa-6,8,10,14-tetraenoate; (6Z,8E,10E,14Z)-(5S,12R)-5,12-Dihydroxyicosa-6,8,10,14-tetraenoate; LTB4;;Leukotriene B4	C02165
		map04142	Lysosome	1	D-Mannose 6-phosphate;	C00275
		map00230	Purine metabolism	1	Hypoxanthine; Purine-6-ol;;Hypoxanthine	C00262
		map04911	Insulin secretion	1	Glucose 6-phosphate; D-Glucose 6-phosphate; Glucose 6-phosphate; Robison ester;	C00092
		map00120	Primary bile acid biosynthesis	1	7alpha-Hydroxy-3-oxo-4-cholestenoate; 7alpha-Hydroxy-3-oxo-4-cholestenoate;	C17337
		map02010	ABC transporters	1	Inositol 1-phosphate; myo-Inositol 1-phosphate; 1D-myo-Inositol 1-phosphate; D-myo-Inositol 1-phosphate; 1D-myo-Inositol 1-monophosphate;	C01177
		map04917	Prolactin signaling pathway	1	Glucose 6-phosphate; D-Glucose 6-phosphate; Glucose 6-phosphate; Robison ester;	C00092
		map00524	Neomycin, kanamycin and gentamicin biosynthesis	1	Glucose 6-phosphate; D-Glucose 6-phosphate; Glucose 6-phosphate; Robison ester;	C00092
		map00140	Steroid hormone biosynthesis	1	Cortol; Cortol;	C05482
		map00040	Pentose and glucuronate interconversions	1	D-Glucose 1-phosphate; alpha-D-Glucose 1-phosphate; Cori ester; D-Glucose alpha-1-phosphate;	C00103
		map04918	Thyroid hormone synthesis	1	Glucose 6-phosphate; D-Glucose 6-phosphate; Glucose 6-phosphate; Robison ester;	C00092
		map00400	Phenylalanine, tyrosine and tryptophan biosynthesis	1	D-Fructose 1-phosphate;	C01094
		map04973	Carbohydrate digestion and absorption	1	Glucose 6-phosphate; D-Glucose 6-phosphate; Glucose 6-phosphate; Robison ester;	C00092
	10 dpi	map01100	Metabolic pathways	113	L-Arabinonate;; D-Mannonate;;Galactonic acid; D-Galactonate; D-Galactonic acid;;Gluconic acid; L-Gulonate; L-Gulonic acid; Gulonate; Gulonic acid;; D-Gluconic acid; D-Gluconate; D-gluco-Hexonic acid;; L-Galactonate; L-Galactonic acid;; D-Altronate;;L-Dopa; 3,4-Dihydroxy-L-phenylalanine; L-Dopa; 3-Hydroxy-L-tyrosine; L-beta-(3,4-Dihydroxyphenyl)alanine; Levodopa; Dihydroxy-L-phenylalanine;; 2-Meth…	C00545+C00514+C00880+C00257+C00800+C15930+C00817+C00355+C02226+C00433+C01732+C00794+C01697+C00666+C00680+C15700+C00047+C00181+C00259+C00310+C00508+C00309+C00312+C05931+C02947+C00055+C06172+C06171+C01898+C01935+C06400+C16262+C00931+C01494+C12204+C04666+C00671+C00233+C06102+C02656+C00499+C06677+C06758+C00601+C07214+C07209+C20782+C00255+C01007+C03114+C08061+C15970+C00449+C11680+C03325+C06305+C06308+…
		map00591	Linoleic acid metabolism	26	9,10-Dihydroxy-12,13-epoxyoctadecanoate; 9,10-Dihydroxy-12,13-epoxyoctadecanoic acid;; 9,12,13-TriHOME; 9(S),12(S),13(S)-Trihydroxy-10(E)-octadecenoic acid; (10E)-(9S,12S,13S)-9,12,13-Trihydroxyoctadec-10-enoic acid;;9,12,13-TriHOME; 9,10,13-TriHOME; 9,10,13-Trihydroxyoctadec-11-enoic acid; (11E)-9,10,13-Trihydroxyoctadec-11-enoic acid;;13-OxoODE;9-OxoODE; 9-OxoODE; 9-KODE; (10E,12Z)-9-Oxooctadec…	C14837+C14833+C14835+C14765+C14766+C14825+C14826+C14767+C14762+C07338+C04717+C14836+C20186+C14834+C14832+C14827+C19937+C07354+C14831+C14828+C14829+C01595+C04056+C07289+C06426+C03242
		map00590	Arachidonic acid metabolism	24	Prostaglandin J2; PGJ2;;Delta-12-Prostaglandin J2; Prostaglandin C2; PGC2;; Delta-12-Prostaglandin J2; Delta-12-PGJ2;;Prostaglandin-c2; Prostaglandin A2; PGA2; Medullin;; Prostaglandin B2; PGB2;; 12-Keto-leukotriene B4; 12-Keto-LTB4; 5-Hydroxy-12-oxo-Delta5,8,11,14-eicosapolyenoic acid;; 5,6-Epoxytetraene; (7E,9E,11Z,13E)-(5S,6S,15S)-5,6-Epoxy-15-hydroxyeicosa-7,9,11,13-tetraenoic acid; (7E,9E,11…	C05957+C05958+C05955+C05953+C05954+C05949+C14815+C14781+C05356+C02165+C14813+C05965+C14820+C05966+C14812+C14821+C14823+C04822+C14808+C14810+C14773+C14775+C14774+C14772
		map04726	Serotonergic synapse	17	Prostaglandin J2; PGJ2;; Prostaglandin C2; PGC2;;Prostaglandin-c2; Prostaglandin A2; PGA2; Medullin;; Prostaglandin B2; PGB2;;Prostaglandin A2;Prostaglandin J2; 5(S)-HPETE; 5(S)-Hydroperoxy-6-trans-8,11,14-cis-eicosatetraenoic acid; (6E,8Z,11Z,14Z)-(5S)-5-Hydroperoxyeicosa-6,8,11,14-tetraenoate; (6E,8Z,11Z,14Z)-(5S)-5-Hydroperoxyeicosa-6,8,11,14-tetraenoic acid; (5S,6E,8Z,11Z,14Z)-5-Hydroperoxyic…	C05957+C05955+C05953+C05954+C05356+C02165+C05965+C14820+C05966+C14812+C14821+C14823+C04822+C14773+C14775+C14774+C14772
		map00040	Pentose and glucuronate interconversions	16	D-Xylonate;; L-Xylonate; L-Xylonic acid;; L-Lyxonate; L-Lyxonic acid;;L-Xylonate; D-Mannonate;; L-Gulonate; L-Gulonic acid; Gulonate; Gulonic acid;; L-Galactonate; L-Galactonic acid;; D-Altronate;; 2,5-Dioxopentanoate; 2-Oxoglutarate semialdehyde;;2,5-Dioxopentanoate;D-Xylose;L-Arabinose; L-Lyxose;; D-Xylulose; D-threo-Pentulose; D-Lyxulose;; L-Ribulose; L-erythro-Pentulose; L-Arabinoketose; L-Ar…	C00502+C05411+C05412+C00514+C00800+C15930+C00817+C00433+C00181+C00259+C01508+C00310+C00508+C00476+C00309+C00312
		map00140	Steroid hormone biosynthesis	12	Cortexolone; 21-Hydroxy-5beta-pregnane-3,11,20-trione;;Corticosterone; Corticosterone; 11beta,21-Dihydroxy-4-pregnene-3,20-dione; Kendall's compound B; Reichstein's substance H;; 11-Deoxycortisol; Cortodoxone;; 21-Deoxycortisol; 4-Pregnene-11beta,17alpha-diol-3,20-dione; 11beta,17alpha-Dihydroxyprogesterone;; Urocortisol; Tetrahydrocortisol; 5beta-Pregnane-3alpha,11beta,17alpha,21-tetrol-20-one;;…	C05488+C05477+C02140+C05497+C05472+C05481+C05487+C05475+C05478+C04555+C05476+C05483
		map02010	ABC transporters	12	Sorbitol; D-Sorbitol; D-Glucitol; L-Gulitol; Sorbitol;; Mannitol; D-Mannitol;;Mannitol;D-Lysine;L-Lysine; L-Lysine; Lysine acid; 2,6-Diaminohexanoic acid;;D-Xylose;L-Arabinose; D-Ribose;;D-Ribose; D-Xylose; Wood sugar;; L-Arabinose; L-Arabinopyranose;; Raffinose; Melitose; Melitriose; Gossypose; 6G-alpha-D-galactosylsucrose;; Maltotriose; Amylotriose;;Maltotriose; Maltodextrin; Maltodextrin(n); M…	C00794+C00392+C00047+C00181+C00259+C00121+C00492+C01835+C01935+C02160+C01946+C01674
		map04976	Bile secretion	11	Taurocholate; Taurocholic acid; Cholyltaurine;; Leukotriene B4; (6Z,8E,10E,14Z)-(5S,12R)-5,12-Dihydroxyeicosa-6,8,10,14-tetraenoate; (6Z,8E,10E,14Z)-(5S,12R)-5,12-Dihydroxyicosa-6,8,10,14-tetraenoate; LTB4;;Leukotriene B4;Topotecan; Topotecan;;Fexofenadine; Fexofenadine; 4-(1-Hydroxy-4-(4-(hydroxydiphenylmethyl)-1-piperidinyl)butyl)-alpha,alpha-dimethylbenzeneacetic acid;; Glycocholate; Glycochol…	C05122+C02165+C11158+C06999+C01921+C05465+C07660+C07014+C04555+C00504+C06956
		map00592	alpha-Linolenic acid metabolism	11	Traumatic acid; Traumatic acid; (2E)-Dodecenedioic acid; Dodec-2-enedioic acid;; 17-Hydroxylinolenic acid; (9Z,12Z,15Z)-17-Hydroxyoctadecatri-9,12,15-enoic acid;; 2(R)-HOT; (2R)-(9Z,12Z,15Z)-2-Hydroxyoctadecatri-9,12,15-enoic acid; 2(R)-HOTrE;;17-Hydroxylinolenic acid; 8-[(1R,2R)-3-Oxo-2-{(Z)-pent-2-enyl}cyclopentyl]octanoate; OPC-8:0;; 9(S)-HOT; (9S)-(10E,12Z,15Z)-9-Hydroxyoctadecatri-10,12,15-e…	C16308+C16346+C16342+C04780+C16326+C16316+C04785+C16321+C16341+C16300+C06427
		map01040	Biosynthesis of unsaturated fatty acids	11	(9Z)-Octadecenoic acid; (Z)-Octadec-9-enoic acid; Oleate; Oleic acid;;Oleic acid;Linoleic acid; Linoleate; Linoleic acid; (9Z,12Z)-Octadecadienoic acid; 9-cis,12-cis-Octadecadienoate; 9-cis,12-cis-Octadecadienoic acid;; (4Z,7Z,10Z,13Z,16Z,19Z)-Docosahexaenoic acid; 4,7,10,13,16,19-Docosahexaenoic acid; Docosahexaenoic acid; Docosahexaenoate;;Docosahexaenoic acid;Eicosapentaenoic acid; (5Z,8Z,11Z,…	C00712+C01595+C06429+C06428+C06427+C06426+C16513+C16522+C03242+C00249+C16527
		map00310	Lysine degradation	8	(3S)-3,6-Diaminohexanoate; L-beta-Lysine;;D-Lysine;(3S)-3,6-Diaminohexanoate;(3S,5S)-3,5-Diaminohexanoate;L-Lysine; L-Lysine; Lysine acid; 2,6-Diaminohexanoic acid;; (3S,5S)-3,5-Diaminohexanoate; L-erythro-3,5-Diaminohexanoate; (3S,5S)-3,5-Diaminocaproate; L-erythro-3,5-Diaminocaproate;; D-Lysine; D-2,6-Diaminohexanoic acid;; (2R,5S)-2,5-Diaminohexanoate;; D-Lysopine; N2-(D-1-Carboxyethyl)-L-lysi…	C01142+C00047+C01186+C00739+C05161+C04020+C02727+C00449
		map01230	Biosynthesis of amino acids	7	Diaminopimelic acid; LL-2,6-Diaminoheptanedioate; LL-2,6-Diaminopimelate; LL-2,6-Diaminopimelic acid;; meso-2,6-Diaminoheptanedioate; meso-2,6-Diaminopimelate; meso-2,6-Diaminopimelic acid; meso-Diaminoheptanedioate;;D-Lysine;L-Lysine; L-Lysine; Lysine acid; 2,6-Diaminohexanoic acid;; D-erythro-1-(Imidazol-4-yl)glycerol 3-phosphate; D-erythro-Imidazole-glycerol 3-phosphate; D-erythro-Imidazole-gl…	C00666+C00680+C00047+C04666+C00671+C00233+C00449
		map00053	Ascorbate and aldarate metabolism	7	L-Xylonate; L-Xylonic acid;; L-Lyxonate; L-Lyxonic acid;; L-Arabinonate;;L-Xylonate; L-Gulonate; L-Gulonic acid; Gulonate; Gulonic acid;; L-Galactonate; L-Galactonic acid;; 2,5-Dioxopentanoate; 2-Oxoglutarate semialdehyde;;2,5-Dioxopentanoate;L-Arabinose; L-Arabinose; L-Arabinopyranose;	C05411+C05412+C00545+C00800+C15930+C00433+C00259
		map00052	Galactose metabolism	6	Galactonic acid; D-Galactonate; D-Galactonic acid;;Sorbitol; Galactitol; Dulcitol; Dulcose;; D-Sorbitol; D-Glucitol; L-Gulitol; Sorbitol;;Galactitol; Raffinose; Melitose; Melitriose; Gossypose; 6G-alpha-D-galactosylsucrose;;D-Gal alpha 1->6D-Gal alpha 1->6D-Glucose; D-Gal alpha 1->6D-Gal alpha 1->6D-Glucose; D-Gal-alpha1->6D-Gal-alpha1->6D-Glucose; Manninotriose;; Stachyose;;Stachyose	C00880+C00794+C01697+C00492+C05404+C01613
		map00980	Metabolism of xenobiotics by cytochrome P450	6	alpha-(1,2-Dihydroxyethyl)-1,2,3,4-tetrahydro-7-hydroxy-9-methoxy-3,4-dioxocyclopenta[c][1]benzopyran-6-acetaldehyde; 1,2,3,4-Tetrahydro-alpha,7-dihydroxy-beta-(hydroxymethyl)-9-methoxy-3,4-dioxocyclopenta[c][1]benzopyran-6-propanal;; alpha-(1,2-Dihydroxyethyl)-1,2,3,4-tetrahydro-7-hydroxy-9-methoxy-3,4-dioxocyclopenta[c][1]benzopyran-6-acetaldehyde;; 1-Naphthylamine;;2-(S-Glutathionyl)acetyl chl…	C19592+C19591+C14790+C14865+C14864+C19569
		map00524	Neomycin, kanamycin and gentamicin biosynthesis	5	6'''-Deamino-6'''-oxoparomomycin II;; 2'-N-Acetylparomamine;; Gentamicin A2;; 5-Ribosylparomamine; Ribosylparomamine;; 5''-Phosphoribosylparomamine;	C21263+C17582+C17701+C18002+C21260
		map04750	Inflammatory mediator regulation of TRP channels	4	Leukotriene B4; (6Z,8E,10E,14Z)-(5S,12R)-5,12-Dihydroxyeicosa-6,8,10,14-tetraenoate; (6Z,8E,10E,14Z)-(5S,12R)-5,12-Dihydroxyicosa-6,8,10,14-tetraenoate; LTB4;; 12(S)-HPETE; (5Z,8Z,10E,14Z)-(12S)-12-Hydroperoxyicosa-5,8,10,14-tetraenoic acid; (5Z,8Z,10E,14Z)-(12S)-12-Hydroperoxyicosa-5,8,10,14-tetraenoate; 12-Hydroperoxyeicosatetraenoate; 12-Hydroperoxyicosatetraenoate; 12-Hydroperoxyeicosatetraen…	C02165+C05965+C05966+C12083
		map00982	Drug metabolism - cytochrome P450	4	2-Propylsuccinic acid; 2-PSA;;4-Hydroxy-5-phenyltetrahydro-1,3-oxazin-2-one; 4-Hydroxy-5-phenyltetrahydro-1,3-oxazin-2-one;; 3-Carbamoyl-2-phenylpropionaldehyde;;3-Carbamoyl-2-phenylpropionaldehyde;Citalopram N-oxide; Citalopram N-oxide;	C16657+C16595+C16587+C16607
		map01210	2-Oxocarboxylic acid metabolism	4	2-Methylmaleate; Citraconate; Citraconic acid; Methylmaleic acid;;Citraconic acid;D-Lysine;L-Lysine; L-Lysine; Lysine acid; 2,6-Diaminohexanoic acid;; (S)-3-Methyl-2-oxopentanoic acid; (S)-3-Methyl-2-oxopentanoate; (3S)-3-Methyl-2-oxopentanoic acid; (3S)-3-Methyl-2-oxopentanoate;; 4-Methyl-2-oxopentanoate; 2-Oxoisocaproate;;Ketoleucine	C02226+C00047+C00671+C00233
		map00360	Phenylalanine metabolism	4	N-benzoylglycinate;Hippuric acid; Hippurate; Hippuric acid; N-Benzoylglycine; Benzoylaminoacetic acid;; 2-Hydroxy-6-ketononatrienedioate; (2Z,4E,7E)-2-Hydroxy-6-oxonona-2,4,7-triene-1,9-dioate;;Phenylacetylglycine; Phenylacetylglycine;;Phenylacetaldehyde; Phenylacetaldehyde; alpha-Tolualdehyde;	C01586+C12624+C05598+C00601
		map03320	PPAR signaling pathway	4	9-cis-Retinoic acid; 9-cis-Retinoic acid;; 9(S)-HODE; (9S)-Hydroxyoctadecadienoic acid; (10E,12Z)-(9S)-9-Hydroxyoctadeca-10,12-dienoic acid;;Alpha-dimorphecolic acid;13S-hydroxyoctadecadienoic acid;13-HODE; 13(S)-HODE; (13S)-Hydroxyoctadecadienoic acid; (9Z,11E)-(13S)-13-Hydroxyoctadeca-9,11-dienoic acid;; Leukotriene B4; (6Z,8E,10E,14Z)-(5S,12R)-5,12-Dihydroxyeicosa-6,8,10,14-tetraenoate; (6Z,8E…	C15493+C14767+C14762+C02165
		map01200	Carbon metabolism	4	Gluconic acid; D-Gluconic acid; D-Gluconate; D-gluco-Hexonic acid;; Mesaconate; 2-Methylfumarate; Mesaconic acid; Methylfumaric acid; (E)-2-Methyl-2-butenedioic acid;;Mesaconic acid; 5,10-Methenyltetrahydrofolate;; 5-Methyltetrahydrofolate;	C00257+C01732+C00445+C00440
		map00500	Starch and sucrose metabolism	4	Cellodextrin; Cellooligosaccharide;;Maltotriose; Maltodextrin; Maltodextrin(n); Maltodextrin(n-2); n+2 Maltodextrin; Linear maltodextrin; Maltooligosaccharide;; Levan; (2,6-beta-D-Fructosyl)n; Levan n; 2,6-beta-D-Fructan; (2,6-beta-D-Fructosyl)n+1;; 1-alpha-D-[(1->4)-alpha-D-Glucosyl](n-1)-alpha-D-glucopyranoside; 4-alpha-D-(1,4-alpha-D-Glucanosyl)n trehalose; Maltooligosyltrehalose;	C01898+C01935+C06215+C06400
		map00860	Porphyrin and chlorophyll metabolism	4	4,5-Dioxopentanoate; 4-Oxoglutarate semialdehyde;;Gamma-delta-Dioxovaleric acid;Porphobilinogen; Porphobilinogen;;Dimethylbenzimidazole; Dimethylbenzimidazole; 5,6-Dimethylbenzimidazole;; Divinylprotochlorophyllide; 2,4-Divinylprotochlorophyllide; Mg-2,4-Divinyl-phaeoporphyrin a5-monomethylester; 3,8-Divinyl protochlorophyllide a;	C02800+C00931+C03114+C11831
		map00330	Arginine and proline metabolism	3	2,5-Dioxopentanoate; 2-Oxoglutarate semialdehyde;;2,5-Dioxopentanoate; gamma-Glutamyl-gamma-aminobutyraldehyde;; N-Succinyl-L-glutamate; (2S)-2-(3-Carboxypropanoylamino)pentanedioic acid;	C00433+C15700+C05931
		map00740	Riboflavin metabolism	3	Riboflavin; Riboflavin; Lactoflavin; 7,8-Dimethyl-10-ribitylisoalloxazine; Vitamin B2;; Reduced riboflavin;;Dimethylbenzimidazole; Dimethylbenzimidazole; 5,6-Dimethylbenzimidazole;	C00255+C01007+C03114
		map00240	Pyrimidine metabolism	3	Deoxycytidine; Deoxycytidine; 2'-Deoxycytidine;;Cytidine monophosphate; 3'-CMP; Cytidine 3'-phosphate;; CMP; Cytidine-5'-monophosphate; Cytidylic acid;	C00881+C00055+C05822
		map00670	One carbon pool by folate	3	5,10-Methenyltetrahydrofolate;; 5-Methyltetrahydrofolate;;Folic acid; Folate; Pteroylglutamic acid; Folic acid;	C00445+C00440+C00504
		map04979	Cholesterol metabolism	3	Taurocholate; Taurocholic acid; Cholyltaurine;; Glycocholate; Glycocholic acid; 3alpha,7alpha,12alpha-Trihydroxy-5beta-cholan-24-oylglycine;; Taurochenodeoxycholate; Taurochenodeoxycholic acid; Chenodeoxycholoyltaurine;;Taurochenodesoxycholic acid	C05122+C01921+C05465
		map00340	Histidine metabolism	3	4-Oxoglutaramate; 4-Ketoglutaramate;; Hydantoin-5-propionate; Hydantoin-propionate;;Hydantoin-5-propionic acid; D-erythro-1-(Imidazol-4-yl)glycerol 3-phosphate; D-erythro-Imidazole-glycerol 3-phosphate; D-erythro-Imidazole-glycerol phosphate;;D-Erythro-imidazole-glycerol-phosphate	C05572+C05565+C04666
		map00120	Primary bile acid biosynthesis	3	Taurocholate; Taurocholic acid; Cholyltaurine;; Glycocholate; Glycocholic acid; 3alpha,7alpha,12alpha-Trihydroxy-5beta-cholan-24-oylglycine;; Taurochenodeoxycholate; Taurochenodeoxycholic acid; Chenodeoxycholoyltaurine;;Taurochenodesoxycholic acid	C05122+C01921+C05465
		map00830	Retinol metabolism	3	all-trans-Retinoic acid; Retinoate; Retinoic acid; Vitamin A acid; all-trans-Retinoate; Acide retinoique (French) (DSL); Tretinoine (French) (EINECS); 3,7-Dimethyl-9-(2,6,6-trimethyl-1-cyclohexene-1-yl)-2,4,6,8-nonatetraenoic acid (ECL); (all-E)-3,7-Dimethyl-9-(2,6,6-trimethyl-1-cyclohexen-1-yl)-2,4,6,8-nonatetraenoic acid; beta-Retinoic acid; AGN 100335; all-(E)-Retinoic acid; all-trans-beta-Ret…	C00777+C15493+C16683
		map00290	Valine, leucine and isoleucine biosynthesis	3	2-Methylmaleate; Citraconate; Citraconic acid; Methylmaleic acid;;Citraconic acid; (S)-3-Methyl-2-oxopentanoic acid; (S)-3-Methyl-2-oxopentanoate; (3S)-3-Methyl-2-oxopentanoic acid; (3S)-3-Methyl-2-oxopentanoate;; 4-Methyl-2-oxopentanoate; 2-Oxoisocaproate;;Ketoleucine	C02226+C00671+C00233
		map00520	Amino sugar and nucleotide sugar metabolism	3	D-Xylose;L-Arabinose; D-Xylose; Wood sugar;; L-Arabinose; L-Arabinopyranose;; Chitobiose; Diacetylchitobiose; N,N'-Diacetylchitobiose;;N,N'-diacetylchitobiose	C00181+C00259+C01674
		map00061	Fatty acid biosynthesis	3	(9Z)-Octadecenoic acid; (Z)-Octadec-9-enoic acid; Oleate; Oleic acid;;Oleic acid;Palmitoleic acid; (9Z)-Hexadecenoic acid; Palmitoleic acid; cis-9-Hexadecenoic acid; (9Z)-Hexadec-9-enoate;;Palmitic acid; Hexadecanoic acid; Hexadecanoate; Hexadecylic acid; Palmitic acid; Palmitate; Cetylic acid;	C00712+C08362+C00249
		map00051	Fructose and mannose metabolism	2	Sorbitol; D-Sorbitol; D-Glucitol; L-Gulitol; Sorbitol;; Mannitol; D-Mannitol;;Mannitol	C00794+C00392
		map04672	Intestinal immune network for IgA production	2	all-trans-Retinoic acid; Retinoate; Retinoic acid; Vitamin A acid; all-trans-Retinoate; Acide retinoique (French) (DSL); Tretinoine (French) (EINECS); 3,7-Dimethyl-9-(2,6,6-trimethyl-1-cyclohexene-1-yl)-2,4,6,8-nonatetraenoic acid (ECL); (all-E)-3,7-Dimethyl-9-(2,6,6-trimethyl-1-cyclohexen-1-yl)-2,4,6,8-nonatetraenoic acid; beta-Retinoic acid; AGN 100335; all-(E)-Retinoic acid; all-trans-beta-Ret…	C00777+C15493
		map00130	Ubiquinone and other terpenoid-quinone biosynthesis	2	all-trans-Octaprenyl diphosphate; Farnesylfarnesylgeraniol;;Octaprenyl diphosphate; 6-Amino-6-deoxyfutalosine;	C04146+C20773
		map00030	Pentose phosphate pathway	2	Gluconic acid; D-Gluconic acid; D-Gluconate; D-gluco-Hexonic acid;; D-Ribose;;D-Ribose	C00257+C00121
		map04913	Ovarian steroidogenesis	2	5(S)-HPETE; 5(S)-Hydroperoxy-6-trans-8,11,14-cis-eicosatetraenoic acid; (6E,8Z,11Z,14Z)-(5S)-5-Hydroperoxyeicosa-6,8,11,14-tetraenoate; (6E,8Z,11Z,14Z)-(5S)-5-Hydroperoxyeicosa-6,8,11,14-tetraenoic acid; (5S,6E,8Z,11Z,14Z)-5-Hydroperoxyicosa-6,8,11,14-tetraenoate;;15(S)-HPETE;5(S)-Hydroperoxyeicosatetraenoic acid; 15(S)-HPETE; (5Z,8Z,11Z,13E)-(15S)-15-Hydroperoxyicosa-5,8,11,13-tetraenoic acid; 1…	C05356+C05966
		map05222	Small cell lung cancer	2	all-trans-Retinoic acid; Retinoate; Retinoic acid; Vitamin A acid; all-trans-Retinoate; Acide retinoique (French) (DSL); Tretinoine (French) (EINECS); 3,7-Dimethyl-9-(2,6,6-trimethyl-1-cyclohexene-1-yl)-2,4,6,8-nonatetraenoic acid (ECL); (all-E)-3,7-Dimethyl-9-(2,6,6-trimethyl-1-cyclohexen-1-yl)-2,4,6,8-nonatetraenoic acid; beta-Retinoic acid; AGN 100335; all-(E)-Retinoic acid; all-trans-beta-Ret…	C00777+C15493
		map00780	Biotin metabolism	2	D-Lysine;L-Lysine; L-Lysine; Lysine acid; 2,6-Diaminohexanoic acid;; Pimelate; Pimelic acid; Heptanedioic acid; 6-Carboxyhexanoate;;Pimelic acid	C00047+C02656
		map05223	Non-small cell lung cancer	2	all-trans-Retinoic acid; Retinoate; Retinoic acid; Vitamin A acid; all-trans-Retinoate; Acide retinoique (French) (DSL); Tretinoine (French) (EINECS); 3,7-Dimethyl-9-(2,6,6-trimethyl-1-cyclohexene-1-yl)-2,4,6,8-nonatetraenoic acid (ECL); (all-E)-3,7-Dimethyl-9-(2,6,6-trimethyl-1-cyclohexen-1-yl)-2,4,6,8-nonatetraenoic acid; beta-Retinoic acid; AGN 100335; all-(E)-Retinoic acid; all-trans-beta-Ret…	C00777+C15493
		map04080	Neuroactive ligand-receptor interaction	2	Angiotensin III;;Angiotensin III; Leukotriene B4; (6Z,8E,10E,14Z)-(5S,12R)-5,12-Dihydroxyeicosa-6,8,10,14-tetraenoate; (6Z,8E,10E,14Z)-(5S,12R)-5,12-Dihydroxyicosa-6,8,10,14-tetraenoate; LTB4;;Leukotriene B4	C15848+C02165
		map01523	Antifolate resistance	2	5-Methyltetrahydrofolate;;Folic acid; Folate; Pteroylglutamic acid; Folic acid;	C00440+C00504
		map04977	Vitamin digestion and absorption	2	Riboflavin; Riboflavin; Lactoflavin; 7,8-Dimethyl-10-ribitylisoalloxazine; Vitamin B2;;Folic acid; Folate; Pteroylglutamic acid; Folic acid;	C00255+C00504
		map05226	Gastric cancer	2	all-trans-Retinoic acid; Retinoate; Retinoic acid; Vitamin A acid; all-trans-Retinoate; Acide retinoique (French) (DSL); Tretinoine (French) (EINECS); 3,7-Dimethyl-9-(2,6,6-trimethyl-1-cyclohexene-1-yl)-2,4,6,8-nonatetraenoic acid (ECL); (all-E)-3,7-Dimethyl-9-(2,6,6-trimethyl-1-cyclohexen-1-yl)-2,4,6,8-nonatetraenoic acid; beta-Retinoic acid; AGN 100335; all-(E)-Retinoic acid; all-trans-beta-Ret…	C00777+C15493
		map04614	Renin-angiotensin system	2	Angiotensin III;;Angiotensin III; Angiotensin A;	C15848+C20970
		map00280	Valine, leucine and isoleucine degradation	2	(S)-3-Methyl-2-oxopentanoic acid; (S)-3-Methyl-2-oxopentanoate; (3S)-3-Methyl-2-oxopentanoic acid; (3S)-3-Methyl-2-oxopentanoate;; 4-Methyl-2-oxopentanoate; 2-Oxoisocaproate;;Ketoleucine	C00671+C00233
		map05012	Parkinson's disease	2	L-Dopa; 3,4-Dihydroxy-L-phenylalanine; L-Dopa; 3-Hydroxy-L-tyrosine; L-beta-(3,4-Dihydroxyphenyl)alanine; Levodopa; Dihydroxy-L-phenylalanine;;Rotenone; Rotenone;	C00355+C07593
		map05200	Pathways in cancer	2	all-trans-Retinoic acid; Retinoate; Retinoic acid; Vitamin A acid; all-trans-Retinoate; Acide retinoique (French) (DSL); Tretinoine (French) (EINECS); 3,7-Dimethyl-9-(2,6,6-trimethyl-1-cyclohexene-1-yl)-2,4,6,8-nonatetraenoic acid (ECL); (all-E)-3,7-Dimethyl-9-(2,6,6-trimethyl-1-cyclohexen-1-yl)-2,4,6,8-nonatetraenoic acid; beta-Retinoic acid; AGN 100335; all-(E)-Retinoic acid; all-trans-beta-Ret…	C00777+C15493
		map00440	Phosphonate and phosphinate metabolism	2	Rhizocticin D;; Rhizocticin C;	C17961+C17960
		map04216	Ferroptosis	2	1-Octadecanoyl-2-(5Z,8Z,11Z,14Z-eicosatetraenoyl)-sn-glycero-3-phosphoethanolamine;;PE(18:0/20:4(5Z,8Z,11Z,14Z)); 7,10,13,16-Docosatetraenoic acid; (7Z,10Z,13Z,16Z)-Docosa-7,10,13,16-tetraenoic acid; Adrenic acid;;Adrenic acid	C21480+C16527
		map04922	Glucagon signaling pathway	1	Glycogen;;Glycogen	C00182
		map04974	Protein digestion and absorption	1	D-Lysine;L-Lysine; L-Lysine; Lysine acid; 2,6-Diaminohexanoic acid;	C00047
		map04211	Longevity regulating pathway	1	Sirolimus; Rapamycin;	C07909
		map05034	Alcoholism	1	L-Dopa; 3,4-Dihydroxy-L-phenylalanine; L-Dopa; 3-Hydroxy-L-tyrosine; L-beta-(3,4-Dihydroxyphenyl)alanine; Levodopa; Dihydroxy-L-phenylalanine;	C00355
		map00071	Fatty acid degradation	1	Palmitic acid; Hexadecanoic acid; Hexadecanoate; Hexadecylic acid; Palmitic acid; Palmitate; Cetylic acid;	C00249
		map00062	Fatty acid elongation	1	Palmitic acid; Hexadecanoic acid; Hexadecanoate; Hexadecylic acid; Palmitic acid; Palmitate; Cetylic acid;	C00249
		map00630	Glyoxylate and dicarboxylate metabolism	1	Mesaconate; 2-Methylfumarate; Mesaconic acid; Methylfumaric acid; (E)-2-Methyl-2-butenedioic acid;;Mesaconic acid	C01732
		map04659	Th17 cell differentiation	1	all-trans-Retinoic acid; Retinoate; Retinoic acid; Vitamin A acid; all-trans-Retinoate; Acide retinoique (French) (DSL); Tretinoine (French) (EINECS); 3,7-Dimethyl-9-(2,6,6-trimethyl-1-cyclohexene-1-yl)-2,4,6,8-nonatetraenoic acid (ECL); (all-E)-3,7-Dimethyl-9-(2,6,6-trimethyl-1-cyclohexen-1-yl)-2,4,6,8-nonatetraenoic acid; beta-Retinoic acid; AGN 100335; all-(E)-Retinoic acid; all-trans-beta-Ret…	C00777
		map00400	Phenylalanine, tyrosine and tryptophan biosynthesis	1	Quinate; Quinic acid; Kinic acid; Chinic acid; L-Quinic acid; L-Quinate; (-)-Quinic acid;	C00296
		map00190	Oxidative phosphorylation	1	QH2; Ubiquinol; QH2; CoQH2;	C00390
		map00430	Taurine and hypotaurine metabolism	1	Taurocholate; Taurocholic acid; Cholyltaurine;	C05122
		map00232	Caffeine metabolism	1	1,3,7-Trimethyluric acid; 1,3,7-Trimethyluric acid; 1,3,7-Trimethylurate;	C16361
		map00350	Tyrosine metabolism	1	L-Dopa; 3,4-Dihydroxy-L-phenylalanine; L-Dopa; 3-Hydroxy-L-tyrosine; L-beta-(3,4-Dihydroxyphenyl)alanine; Levodopa; Dihydroxy-L-phenylalanine;	C00355
		map04925	Aldosterone synthesis and secretion	1	Corticosterone; Corticosterone; 11beta,21-Dihydroxy-4-pregnene-3,20-dione; Kendall's compound B; Reichstein's substance H;	C02140
		map00250	Alanine, aspartate and glutamate metabolism	1	2-Keto-glutaramic acid; 2-Oxoglutaramate; 2-Oxoglutaramic acid; alpha-Ketoglutaramate; 2-Ketoglutaramate;	C00940
		map00983	Drug metabolism - other enzymes	1	6-Thioinosine-5'-monophosphate; 9-(5-Phospho-1-ribofuranosyl)-6-mercaptopurine;;6-Thioinosine-5'-monophosphate	C04646
		map04728	Dopaminergic synapse	1	L-Dopa; 3,4-Dihydroxy-L-phenylalanine; L-Dopa; 3-Hydroxy-L-tyrosine; L-beta-(3,4-Dihydroxyphenyl)alanine; Levodopa; Dihydroxy-L-phenylalanine;	C00355
		map04917	Prolactin signaling pathway	1	L-Dopa; 3,4-Dihydroxy-L-phenylalanine; L-Dopa; 3-Hydroxy-L-tyrosine; L-beta-(3,4-Dihydroxyphenyl)alanine; Levodopa; Dihydroxy-L-phenylalanine;	C00355
		map00790	Folate biosynthesis	1	Folic acid; Folate; Pteroylglutamic acid; Folic acid;	C00504
		map04923	Regulation of lipolysis in adipocytes	1	Corticosterone; Corticosterone; 11beta,21-Dihydroxy-4-pregnene-3,20-dione; Kendall's compound B; Reichstein's substance H;	C02140
		map00230	Purine metabolism	1	Allantoic acid; Allantoate; Allantoic acid;	C00499
		map04218	Cellular senescence	1	Sirolimus; Rapamycin;	C07909
		map00900	Terpenoid backbone biosynthesis	1	all-trans-Octaprenyl diphosphate; Farnesylfarnesylgeraniol;;Octaprenyl diphosphate	C04146
		map00970	Aminoacyl-tRNA biosynthesis	1	D-Lysine;L-Lysine; L-Lysine; Lysine acid; 2,6-Diaminohexanoic acid;	C00047
		map04920	Adipocytokine signaling pathway	1	9-cis-Retinoic acid; 9-cis-Retinoic acid;	C15493
		map05031	Amphetamine addiction	1	L-Dopa; 3,4-Dihydroxy-L-phenylalanine; L-Dopa; 3-Hydroxy-L-tyrosine; L-beta-(3,4-Dihydroxyphenyl)alanine; Levodopa; Dihydroxy-L-phenylalanine;	C00355
		map04973	Carbohydrate digestion and absorption	1	Maltotriose; Amylotriose;	C01835
		map05020	Prion diseases	1	Corticosterone; Corticosterone; 11beta,21-Dihydroxy-4-pregnene-3,20-dione; Kendall's compound B; Reichstein's substance H;	C02140
		map05204	Chemical carcinogenesis	1	3-Succinoylpyridine; 4-Oxo-4-(pyridin-3-yl)butanoate;;3-Succinoylpyridine	C19569
		map00760	Nicotinate and nicotinamide metabolism	1	3-Succinoylpyridine; 4-Oxo-4-(pyridin-3-yl)butanoate;;3-Succinoylpyridine	C19569
		map05030	Cocaine addiction	1	L-Dopa; 3,4-Dihydroxy-L-phenylalanine; L-Dopa; 3-Hydroxy-L-tyrosine; L-beta-(3,4-Dihydroxyphenyl)alanine; Levodopa; Dihydroxy-L-phenylalanine;	C00355
		map01212	Fatty acid metabolism	1	Palmitic acid; Hexadecanoic acid; Hexadecanoate; Hexadecylic acid; Palmitic acid; Palmitate; Cetylic acid;	C00249
		map00600	Sphingolipid metabolism	1	Psychosine; Galactosylsphingosine; O-Galactosylsphingosine;;Galactosylsphingosine	C01747
	36 dpi	map01100	Metabolic pathways	29	Uric acid; Urate; Uric acid;; 4-Coumaroylshikimate; trans-5-O-(4-Coumaroyl)shikimate;; Xanthine;;Xanthine;3,4-Dihydroxymandelaldehyde; Homogentisate; Homogentisic acid; 2,5-Dihydroxyphenylacetic acid; 2,5-Dihydroxyphenylacetate;; 3,4-Dihydroxymandelaldehyde; 3,4-Dihydroxyphenylglycolaldehyde;; 2-Hydroxy-6-oxoocta-2,4,7-trienoate;; 3,4-Dihydroxyphenylacetate; 3,4-Dihydroxyphenylacetic acid; Homopr…	C00366+C02947+C00385+C05577+C00544+C07087+C01161+C18911+C01107+C00236+C01159+C00365+C02426+C00577+C00186+C01013+C00184+C02226+C00433+C01732+C00463+C03506+C03114+C06677+C05122+C00909+C11831+C00500+C00486
		map00860	Porphyrin and chlorophyll metabolism	8	4,5-Dioxopentanoate; 4-Oxoglutarate semialdehyde;;Gamma-delta-Dioxovaleric acid;Dimethylbenzimidazole; Dimethylbenzimidazole; 5,6-Dimethylbenzimidazole;; Divinylprotochlorophyllide; 2,4-Divinylprotochlorophyllide; Mg-2,4-Divinyl-phaeoporphyrin a5-monomethylester; 3,8-Divinyl protochlorophyllide a;; Biliverdin; Biliverdin IX alpha;;Biliverdin; 12-Ethyl-8-propyl-3-vinylbacteriochlorophyllide d;; (3…	C02800+C03114+C11831+C00500+C21428+C05913+C00486+C11630
		map01200	Carbon metabolism	5	3-Phospho-D-glyceroyl phosphate; 1,3-Bisphospho-D-glycerate; (R)-2-Hydroxy-3-(phosphonooxy)-1-monoanhydride with phosphoric propanoic acid; D-Glycerate 1,3-diphosphate;; D-Glyceraldehyde;;Hydroxypropionic acid; 3-Hydroxypropanoate; 3-Hydroxypropanoic acid; 3-Hydroxypropionate; 3-Hydroxypropionic acid; Hydracrylic acid;;Dihydroxyacetone; Glycerone; Dihydroxyacetone; 1,3-Dihydroxyacetone; 1,3-Dihyd…	C00236+C00577+C01013+C00184+C01732
		map00590	Arachidonic acid metabolism	4	5-KETE; 15-OxoETE; (5Z,8Z,11Z,13E)-15-Oxoicosa-5,8,11,13-tetraenoic acid; 15-Oxo-5,8,11-cis-13-trans-eicosatetraenoate; 15-Oxo-5,8,11-cis-13-trans-icosatetraenoate;;Leukotriene A4; 5-OxoETE; (6E,8Z,11Z,14Z)-5-Oxoicosa-6,8,11,14-tetraenoic acid; 5-Oxoeicosatetraenoic acid; 5-Oxoicosatetraenoic acid;;12-KETE; Leukotriene A4; LTA4; (7E,9E,11Z,14Z)-(5S,6S)-5,6-Epoxyeicosa-7,9,11,14-tetraenoic acid; (…	C14732+C04577+C00909+C14807
		map00350	Tyrosine metabolism	4	3,4-Dihydroxymandelaldehyde; Homogentisate; Homogentisic acid; 2,5-Dihydroxyphenylacetic acid; 2,5-Dihydroxyphenylacetate;; 3,4-Dihydroxymandelaldehyde; 3,4-Dihydroxyphenylglycolaldehyde;; 3,4-Dihydroxyphenylacetate; 3,4-Dihydroxyphenylacetic acid; Homoprotocatechuate;;3,4-Dihydroxybenzeneacetic acid;Homogentisic acid; p-Hydroxyphenylacetylglycine; 4-Hydroxyphenylacetylglycine;;Hydroxyphenylacety…	C05577+C00544+C01161+C05596
		map00982	Drug metabolism - cytochrome P450	3	3-Carbamoyl-2-phenylpropionic acid;;3-Carbamoyl-2-phenylpropionic acid; 3-Carbamoyl-2-phenylpropionaldehyde;; 4-Hydroxy-5-phenyltetrahydro-1,3-oxazin-2-one;;3-Carbamoyl-2-phenylpropionaldehyde;4-Hydroxy-5-phenyltetrahydro-1,3-oxazin-2-one	C16591+C16587+C16595
		map04976	Bile secretion	3	Uric acid; Urate; Uric acid;; Taurocholate; Taurocholic acid; Cholyltaurine;; Bilirubin;;Bilirubin	C00366+C05122+C00486
		map00010	Glycolysis / Gluconeogenesis	3	3-Phospho-D-glyceroyl phosphate; 1,3-Bisphospho-D-glycerate; (R)-2-Hydroxy-3-(phosphonooxy)-1-monoanhydride with phosphoric propanoic acid; D-Glycerate 1,3-diphosphate;; 2,3-Bisphospho-D-glycerate; 2,3-Disphospho-D-glycerate; D-Greenwald ester; DPG;;2,3-Diphosphoglyceric acid;L-Lactic acid; (S)-Lactate; L-Lactate; L-Lactic acid;	C00236+C01159+C00186
		map00360	Phenylalanine metabolism	2	2,6-Dihydroxyphenylacetate;;Phenylacetylglycine; Phenylacetylglycine;	C06207+C05598
		map00040	Pentose and glucuronate interconversions	2	L-Glyceraldehyde; L-2,3-Dihydroxypropionaldehyde; L-2,3-Dihydroxypropanal; L-Glycerose; L-Aldotriose;; 2,5-Dioxopentanoate; 2-Oxoglutarate semialdehyde;;2,5-Dioxopentanoate	C02426+C00433
		map00240	Pyrimidine metabolism	2	dUMP; Deoxyuridylic acid; Deoxyuridine monophosphate; Deoxyuridine 5'-phosphate; 2'-Deoxyuridine 5'-phosphate;;dUMP;Hydroxypropionic acid; 3-Hydroxypropanoate; 3-Hydroxypropanoic acid; 3-Hydroxypropionate; 3-Hydroxypropionic acid; Hydracrylic acid;	C00365+C01013
		map00900	Terpenoid backbone biosynthesis	2	(R)-Mevalonate 3-phosphate; (R)-3-Phosphomevalonate;; (R)-5-Phosphomevalonate; (R)-5-Phosphomevaloonic acid; (R)-Mevalonic acid 5-phosphate;;Mevalonic acid-5P	C20847+C01107
		map00051	Fructose and mannose metabolism	2	D-Glyceraldehyde;;L-Lactic acid; (S)-Lactate; L-Lactate; L-Lactic acid;	C00577+C00186
		map00053	Ascorbate and aldarate metabolism	2	Threonate; L-Threonate; (2R,3S)-2,3,4-Trihydroxybutanoic acid;;L-threonic Acid; 2,5-Dioxopentanoate; 2-Oxoglutarate semialdehyde;;2,5-Dioxopentanoate	C01620+C00433
		map00640	Propanoate metabolism	2	L-Lactic acid;Hydroxypropionic acid; 3-Hydroxypropanoate; 3-Hydroxypropanoic acid; 3-Hydroxypropionate; 3-Hydroxypropionic acid; Hydracrylic acid;; (S)-Lactate; L-Lactate; L-Lactic acid;	C00186+C01013
		map00400	Phenylalanine, tyrosine and tryptophan biosynthesis	2	Indole; 2,3-Benzopyrrole;;Indole; Indoleglycerol phosphate; 1-C-(Indol-3-yl)glycerol 3-phosphate; (3-Indolyl)-glycerol phosphate; C1-(3-Indolyl)-glycerol 3-phosphate; (1S,2R)-1-C-(Indol-3-yl)glycerol 3-phosphate; Indole-3-glycerol phosphate;	C00463+C03506
		map00230	Purine metabolism	2	Uric acid; Urate; Uric acid;; Xanthine;;Xanthine	C00366+C00385
		map00561	Glycerolipid metabolism	2	D-Glyceraldehyde;;Dihydroxyacetone; Glycerone; Dihydroxyacetone; 1,3-Dihydroxyacetone; 1,3-Dihydroxy-2-propanone; 1,3-Dihydroxypropan-2-one;	C00577+C00184
		map00620	Pyruvate metabolism	2	L-Lactic acid;D-Lactic acid; (S)-Lactate; L-Lactate; L-Lactic acid;; (R)-Lactate; D-Lactate; D-Lactic acid; D-2-Hydroxypropanoic acid; D-2-Hydroxypropionic acid;	C00186+C00256
		map01230	Biosynthesis of amino acids	2	3-Phospho-D-glyceroyl phosphate; 1,3-Bisphospho-D-glycerate; (R)-2-Hydroxy-3-(phosphonooxy)-1-monoanhydride with phosphoric propanoic acid; D-Glycerate 1,3-diphosphate;; Indoleglycerol phosphate; 1-C-(Indol-3-yl)glycerol 3-phosphate; (3-Indolyl)-glycerol phosphate; C1-(3-Indolyl)-glycerol 3-phosphate; (1S,2R)-1-C-(Indol-3-yl)glycerol 3-phosphate; Indole-3-glycerol phosphate;	C00236+C03506
		map04066	HIF-1 signaling pathway	1	L-Lactic acid; (S)-Lactate; L-Lactate; L-Lactic acid;	C00186
		map04979	Cholesterol metabolism	1	Taurocholate; Taurocholic acid; Cholyltaurine;	C05122
		map00290	Valine, leucine and isoleucine biosynthesis	1	2-Methylmaleate; Citraconate; Citraconic acid; Methylmaleic acid;;Citraconic acid	C02226
		map00232	Caffeine metabolism	1	Xanthine;;Xanthine	C00385
		map04922	Glucagon signaling pathway	1	L-Lactic acid; (S)-Lactate; L-Lactate; L-Lactic acid;	C00186
		map04024	cAMP signaling pathway	1	L-Lactic acid; (S)-Lactate; L-Lactate; L-Lactic acid;	C00186
		map01523	Antifolate resistance	1	dUMP; Deoxyuridylic acid; Deoxyuridine monophosphate; Deoxyuridine 5'-phosphate; 2'-Deoxyuridine 5'-phosphate;;dUMP	C00365
		map00410	beta-Alanine metabolism	1	Hydroxypropionic acid; 3-Hydroxypropanoate; 3-Hydroxypropanoic acid; 3-Hydroxypropionate; 3-Hydroxypropionic acid; Hydracrylic acid;	C01013
		map00330	Arginine and proline metabolism	1	2,5-Dioxopentanoate; 2-Oxoglutarate semialdehyde;;2,5-Dioxopentanoate	C00433
		map05230	Central carbon metabolism in cancer	1	L-Lactic acid; (S)-Lactate; L-Lactate; L-Lactic acid;	C00186
		map00430	Taurine and hypotaurine metabolism	1	Taurocholate; Taurocholic acid; Cholyltaurine;	C05122
		map00450	Selenocompound metabolism	1	L-Selenomethionine;	C05335
		map00740	Riboflavin metabolism	1	Dimethylbenzimidazole; Dimethylbenzimidazole; 5,6-Dimethylbenzimidazole;	C03114
		map00130	Ubiquinone and other terpenoid-quinone biosynthesis	1	Homogentisate; Homogentisic acid; 2,5-Dihydroxyphenylacetic acid; 2,5-Dihydroxyphenylacetate;;Homogentisic acid	C00544
		map04726	Serotonergic synapse	1	Leukotriene A4; Leukotriene A4; LTA4; (7E,9E,11Z,14Z)-(5S,6S)-5,6-Epoxyeicosa-7,9,11,14-tetraenoic acid; (7E,9E,11Z,14Z)-(5S,6S)-5,6-Epoxyeicosa-7,9,11,14-tetraenoate; (7E,9E,11Z,14Z)-(5S,6S)-5,6-Epoxyicosa-7,9,11,14-tetraenoate; (5S,6S,7E,9E,11Z,14Z)-5,6-Epoxyicosa-7,9,11,14-tetraenoate;	C00909
		map00630	Glyoxylate and dicarboxylate metabolism	1	Mesaconate; 2-Methylfumarate; Mesaconic acid; Methylfumaric acid; (E)-2-Methyl-2-butenedioic acid;;Mesaconic acid	C01732
		map05031	Amphetamine addiction	1	3,4-Dihydroxyphenylacetate; 3,4-Dihydroxyphenylacetic acid; Homoprotocatechuate;;3,4-Dihydroxybenzeneacetic acid	C01161
		map00380	Tryptophan metabolism	1	Indole; 2,3-Benzopyrrole;;Indole	C00463
		map00030	Pentose phosphate pathway	1	D-Glyceraldehyde;	C00577
		map00052	Galactose metabolism	1	D-Glyceraldehyde;	C00577
		map04974	Protein digestion and absorption	1	Indole; 2,3-Benzopyrrole;;Indole	C00463
		map00770	Pantothenate and CoA biosynthesis	1	(R)-4-Phosphopantoate;	C18911
		map01210	2-Oxocarboxylic acid metabolism	1	2-Methylmaleate; Citraconate; Citraconic acid; Methylmaleic acid;;Citraconic acid	C02226
		map00190	Oxidative phosphorylation	1	Pyrophosphate; Diphosphate; Diphosphoric acid; Pyrophosphate; Pyrophosphoric acid; PPi;	C00013
		map05012	Parkinson's disease	1	Pyrophosphate; Diphosphate; Diphosphoric acid; Pyrophosphate; Pyrophosphoric acid; PPi;	C00013
		map05034	Alcoholism	1	3,4-Dihydroxyphenylacetate; 3,4-Dihydroxyphenylacetic acid; Homoprotocatechuate;;3,4-Dihydroxybenzeneacetic acid	C01161
		map04728	Dopaminergic synapse	1	3,4-Dihydroxyphenylacetate; 3,4-Dihydroxyphenylacetic acid; Homoprotocatechuate;;3,4-Dihydroxybenzeneacetic acid	C01161
		map00120	Primary bile acid biosynthesis	1	Taurocholate; Taurocholic acid; Cholyltaurine;	C05122
		map05030	Cocaine addiction	1	3,4-Dihydroxyphenylacetate; 3,4-Dihydroxyphenylacetic acid; Homoprotocatechuate;;3,4-Dihydroxybenzeneacetic acid	C01161
